# Supplementary material for: Three-dimensional structured illumination microscopy with enhanced axial resolution
Source: PubMed Central journal article supplement (PMC10497409; doi:10.1038/s41587-022-01651-1), 2023-01-26
Supplement: 41587_2022_1651_MOESM1_ESM.pdf [file 41587_2022_1651_MOESM1_ESM.pdf]

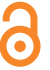

---

# Three-dimensional structured illumination microscopy with enhanced axial resolution

---

In the format provided by the authors and unedited

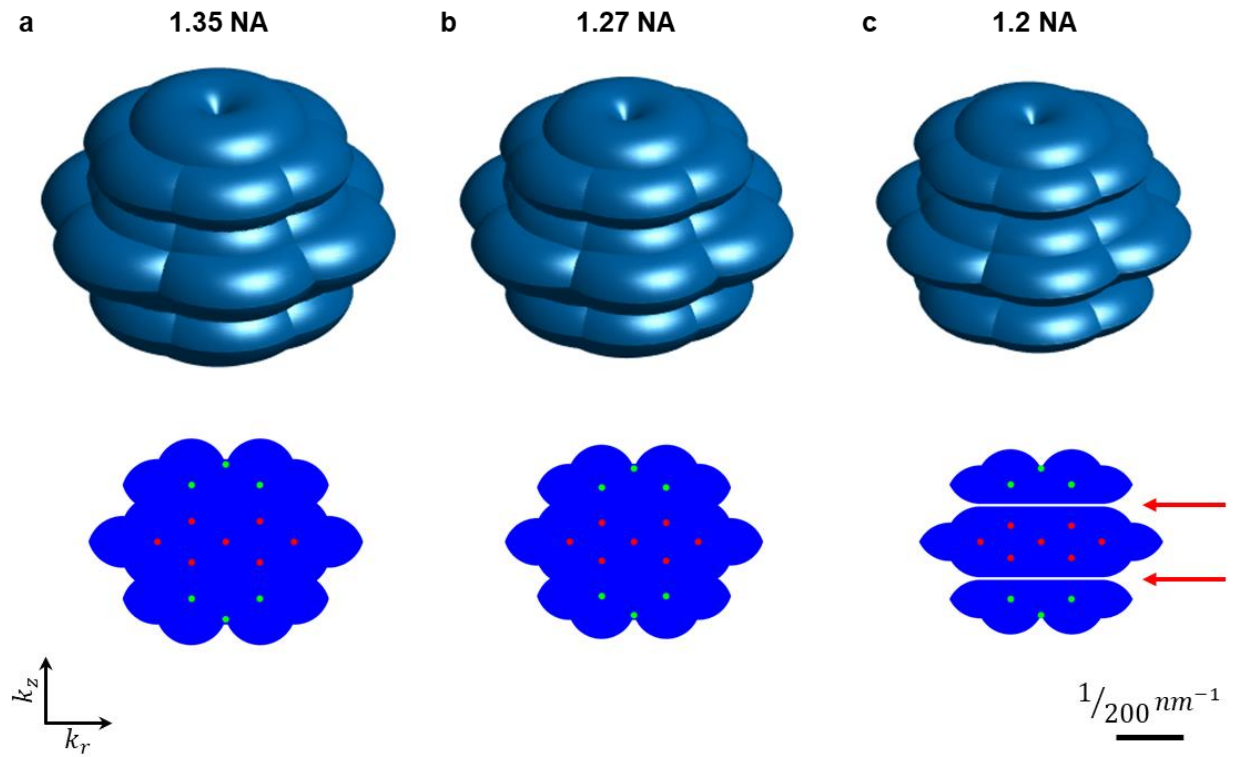

**Supplementary Fig. 1, Support of four-beam SIM optical transfer functions for commercially available objective lenses.** **a)** 1.35 NA silicone oil, **b)** 1.27 NA water immersion lens, **c)** 1.2 NA water immersion lens. Top row: 3D projection views; bottom row: axial cross sections as in **Extended Data Fig. 1**. Red arrows in **c)** highlight ‘gaps’ in spatial frequency support for the 1.2 NA lens case, absent when using the 1.35 NA or 1.27 NA lenses. Simulation parameters: emission NA = 1.35, 1.27, 1.2; refractive index of immersion medium = 1.406 in **a)**, 1.33 in **b)**, **c)**; excitation wavelength: 488 nm; emission wavelength: 525 nm; side beams at 92% of pupil radius.

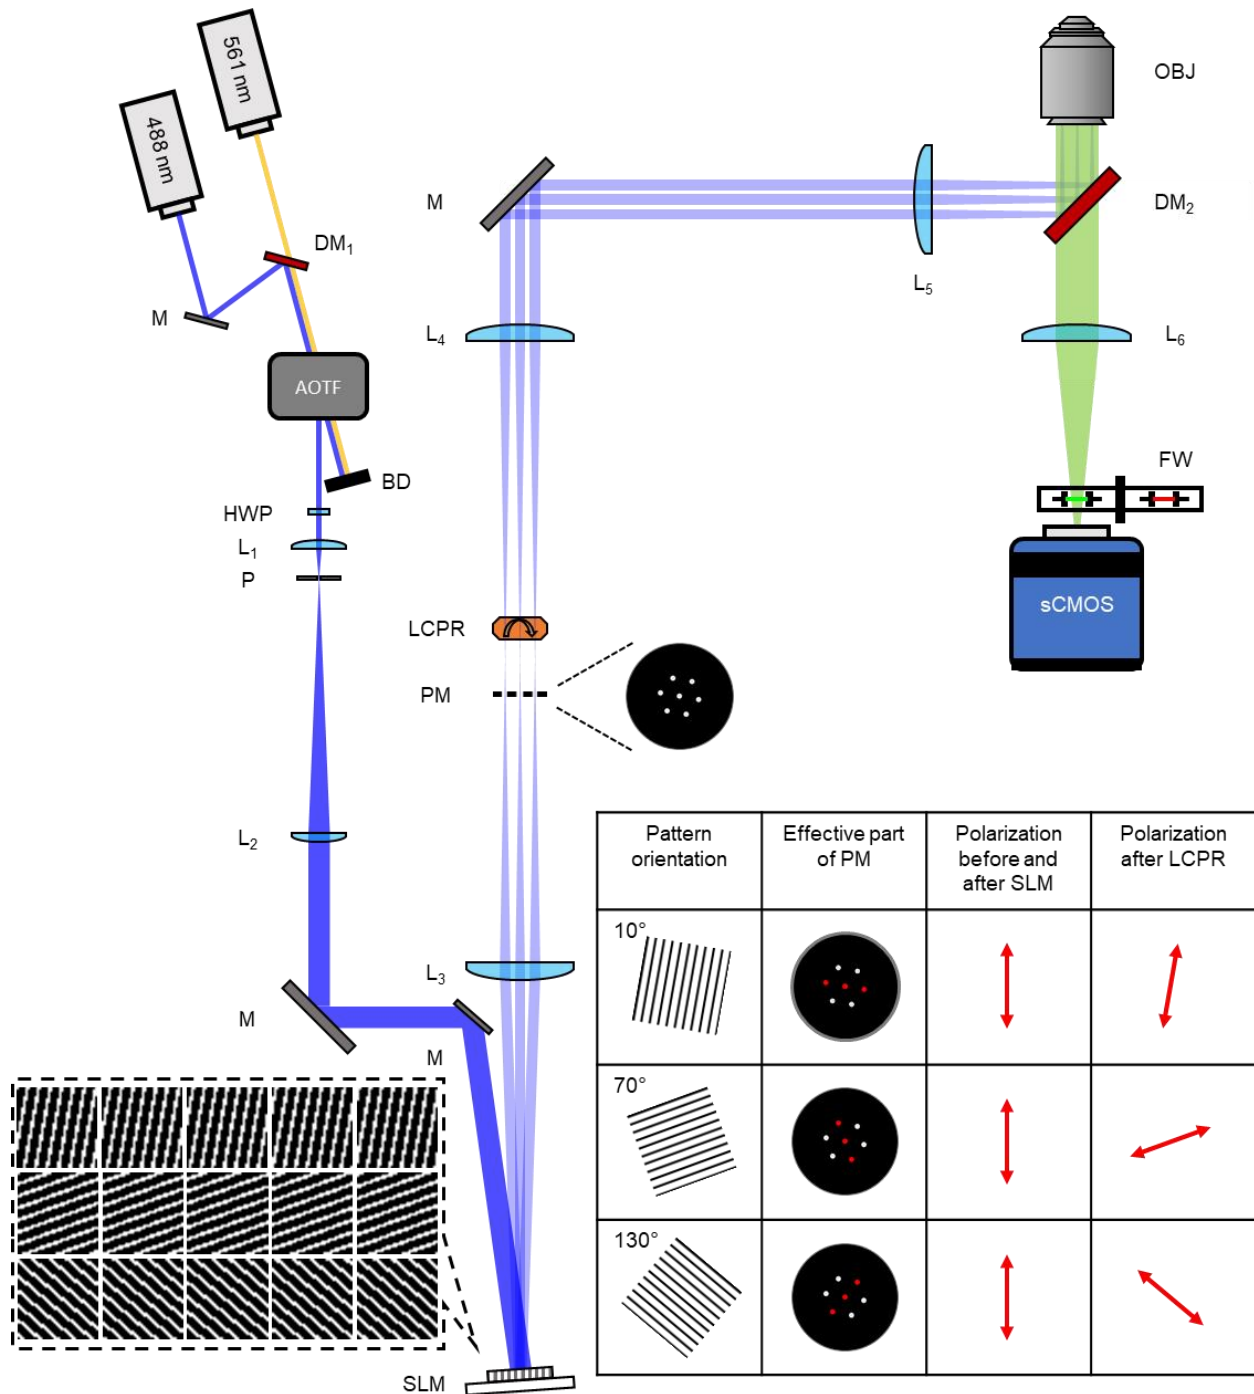

**Supplementary Fig. 2, Optical layout of home-built 3D SIM system used in this work.** The output from linearly polarized, 488 nm and 561 nm diode lasers are combined via a dichroic mirror (DM1) and passed through an acousto-optic tunable filter (AOTF) for rapid shuttering and intensity control. The first-order beam is selected (the zero-order beam is shunted to a beam dump, BD), and spatially filtered (focused via lens L1 onto pinhole P then collimated and expanded via lens L2) before being redirected onto a phase-only spatial light modulator (SLM) at near normal incidence. A half wave plate (HWP) positioned prior to the spatial filter is used to adjust the direction of linear polarization, aligning it for maximum phase

modulation by the SLM and thereby ensuring high contrast for the 15 patterns used in 3D SIM (shown in left inset). Lens L3 is positioned one focal length after the SLM, producing a Fourier image of the illumination pattern at its focus. A pinhole mask (PM) placed at this plane serves to filter out unwanted illumination orders. A telescope (lens pair L4 and L5 placed in  $4f$  configuration) relays the image of the illuminated mask to the back focal plane of the objective lens (OBJ), which produces the illumination pattern (image of the SLM) at the sample. A liquid crystal polarization rotator (LCPR) is used for rapid rotation of the polarization state post-SLM, producing mostly  $s$  polarized illumination at the sample and thus high illumination pattern contrast there (right inset shows relationship between pattern orientation, illumination state of the mask, and polarization rotation after LCPR; note images show plane perpendicular to beam propagation). Fluorescence is isolated post-objective via a dichroic mirror (DM2) and imaged to a scientific complementary metal-oxide-semiconductor detector (sCMOS) mounted on a translation stage via tube lens L6. Emission filters mounted in a filter wheel (FW) serve to further isolate fluorescence and select appropriate spectral bands. See **Methods** for further information.

a

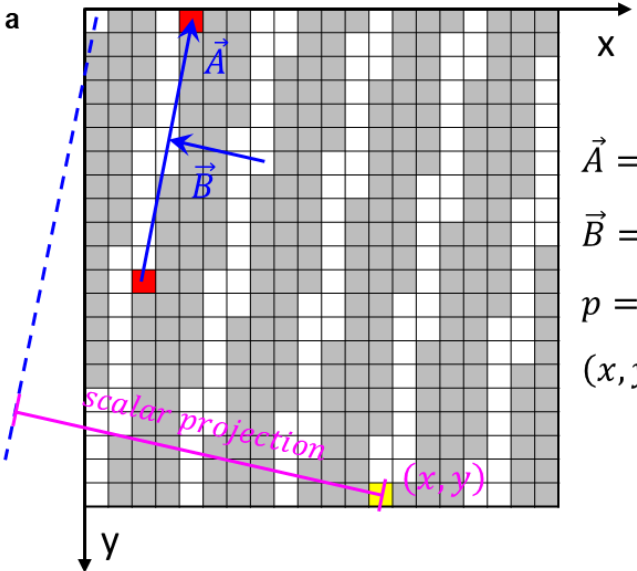

$$\vec{A} = (2, -11)$$

$$\vec{B} = (-4, -0.72)$$

$$p = 4.06$$

$$(x, y) = (12, 20)$$

b

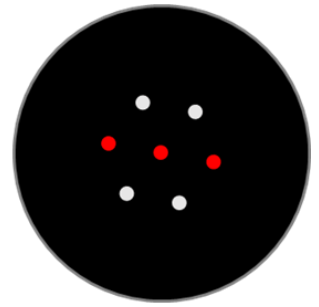

$$\theta_1 = \arctan\left(\frac{A_x}{A_y}\right)$$

$$= \arctan\left(\frac{2}{-11}\right) = -10.3^\circ$$

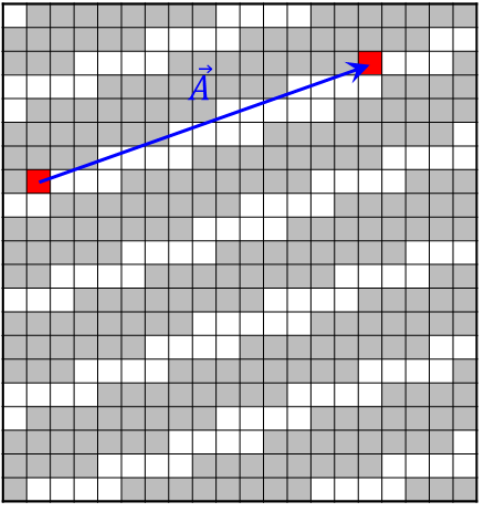

$$\vec{A} = (14, -5)$$

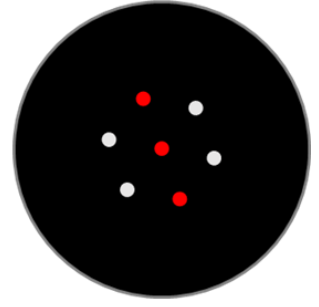

$$\theta_2 = \arctan\left(\frac{14}{-5}\right) = -70.3^\circ$$

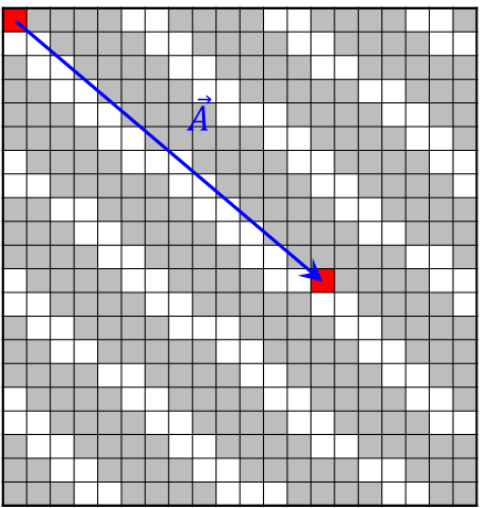

$$\vec{A} = (13, 11)$$

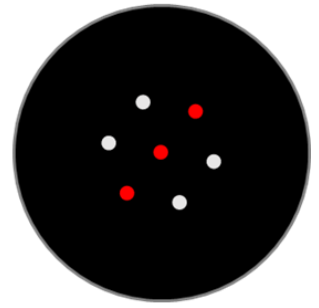

$$\theta_3 = \arctan\left(\frac{13}{11}\right) = 49.8^\circ$$

**Supplementary Fig. 3, SLM pattern generation with tunable period and duty cycle.** **a)** Example SLM patterns with 4.06-pixel period and 33% duty cycle used for 488 nm excitation with 1.27 NA objective. Top panel shows first orientation and defines relevant quantities; other panels show second and third orientations. **b)** The angles and corresponding components (red) transmitted through the PM for the 3 pattern directions. In **a)**, the pattern orientation is specified by the blue-colored vector  $\vec{A}$  (defined between the two pixels colored in red) and the periodicity  $p$  by another blue-colored vector  $\vec{B}$ . The blue dashed line is the extension along the direction of vector  $\vec{A}$  through the origin, drawn for illustration purposes only. For an arbitrary pixel coordinate  $(x, y)$  on the SLM (pixel colored in yellow), the magenta projection represents the scalar projection of vector  $(x, y)$  onto vector  $\vec{B}$ , which is -15.4 when  $(x, y) = (12, 20)$ . The modulo after dividing the scalar projection by the magnitude of  $\vec{B}$  serves as the criterion for whether the pixel is set to 0 (gray) or  $\pi$  (white) retardance. For example, the magnitude of  $\vec{B}$  is 4.06, the modulo after dividing -15.4 by 4.06 is 0.86 pixels, which is smaller than 1.34 pixels (33% duty cycle multiplied with 4.06-pixel period), so (12, 20) was assigned to the on-state ( $\pi$  phase retardance) as shown in the figure.

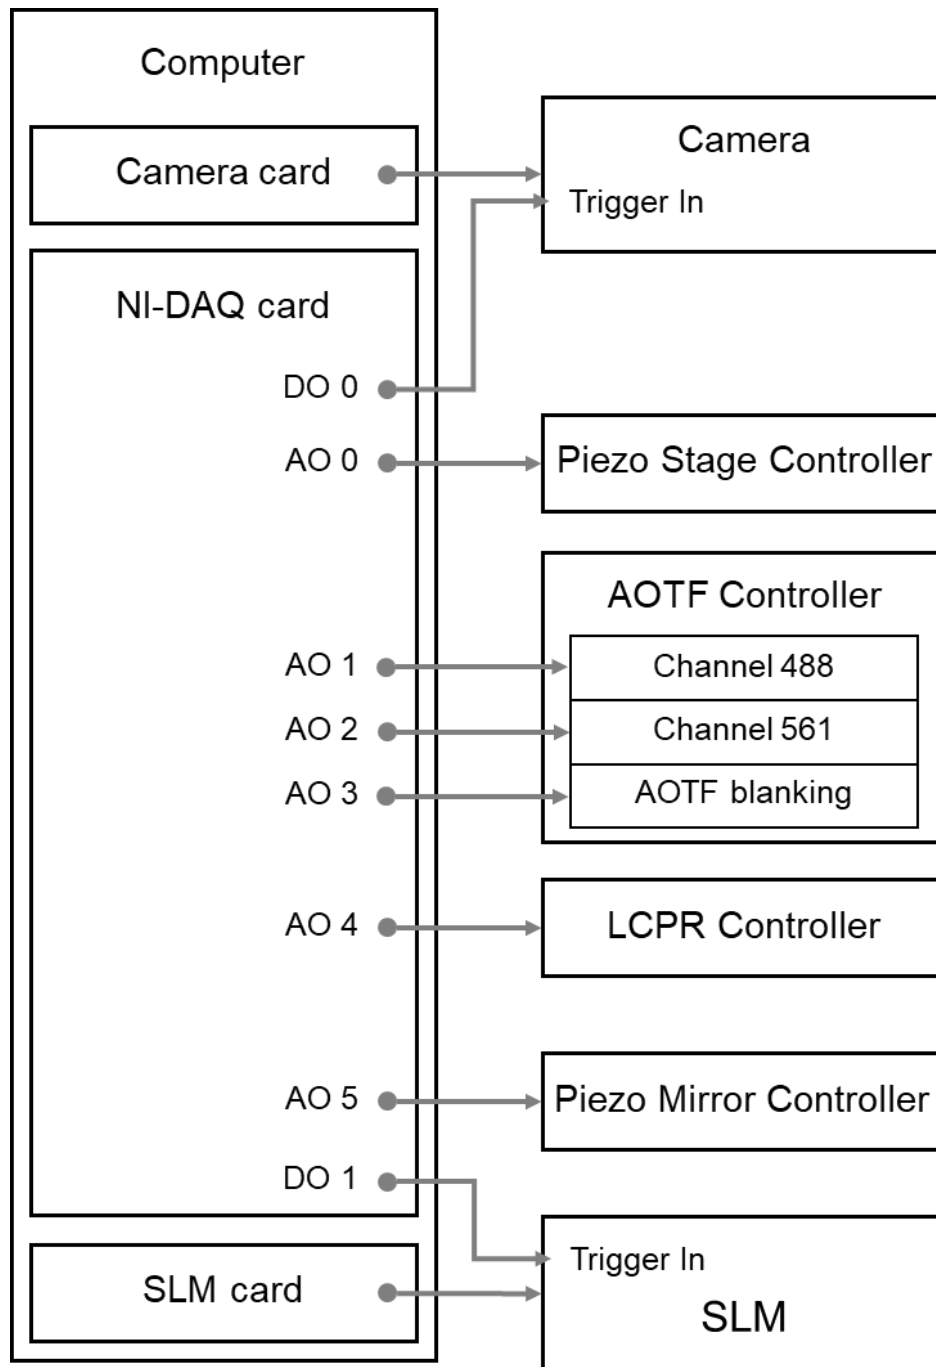

**Supplementary Fig. 4, Hardware control schematic.** DO: digital output. AO: analog output. DAQ: data acquisition. AOTF: acousto-optic tunable filter. SLM: spatial light modulator. LCPR: liquid crystal polarization rotator. Camera acquisition card, NI-DAQ card and SLM control card all reside in the workstation shown by the left box; commands are then issued to devices as indicated. See also **Methods**, **Supplementary Fig. 5, 6**.

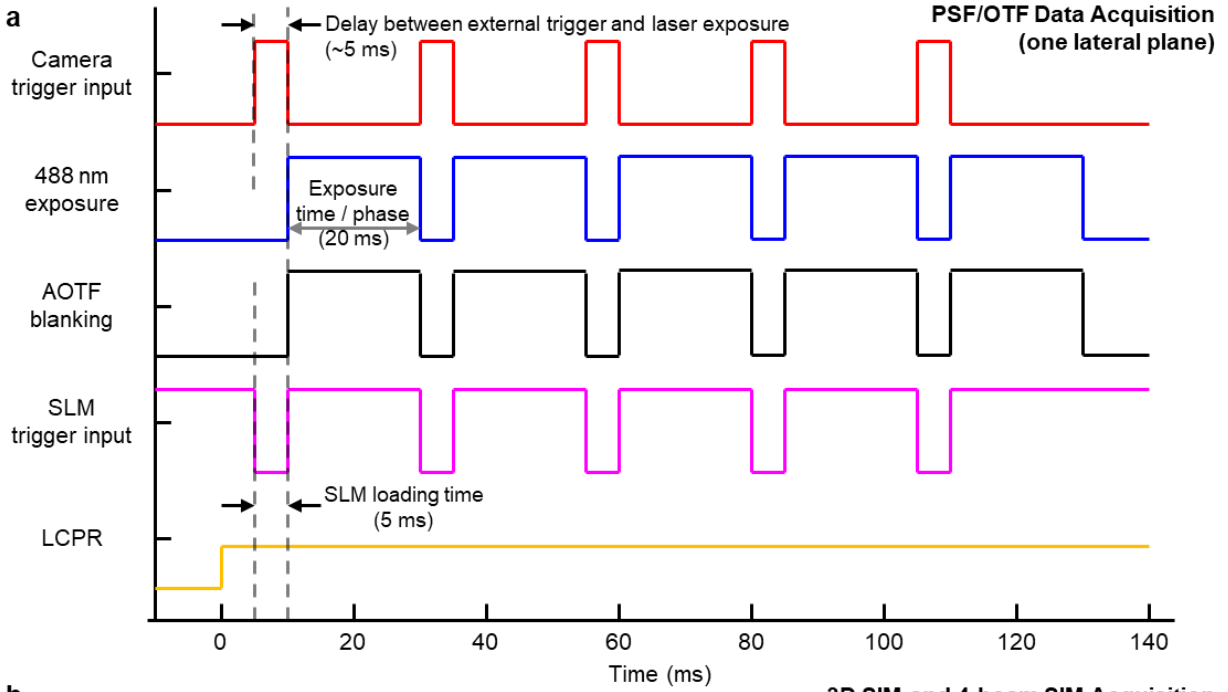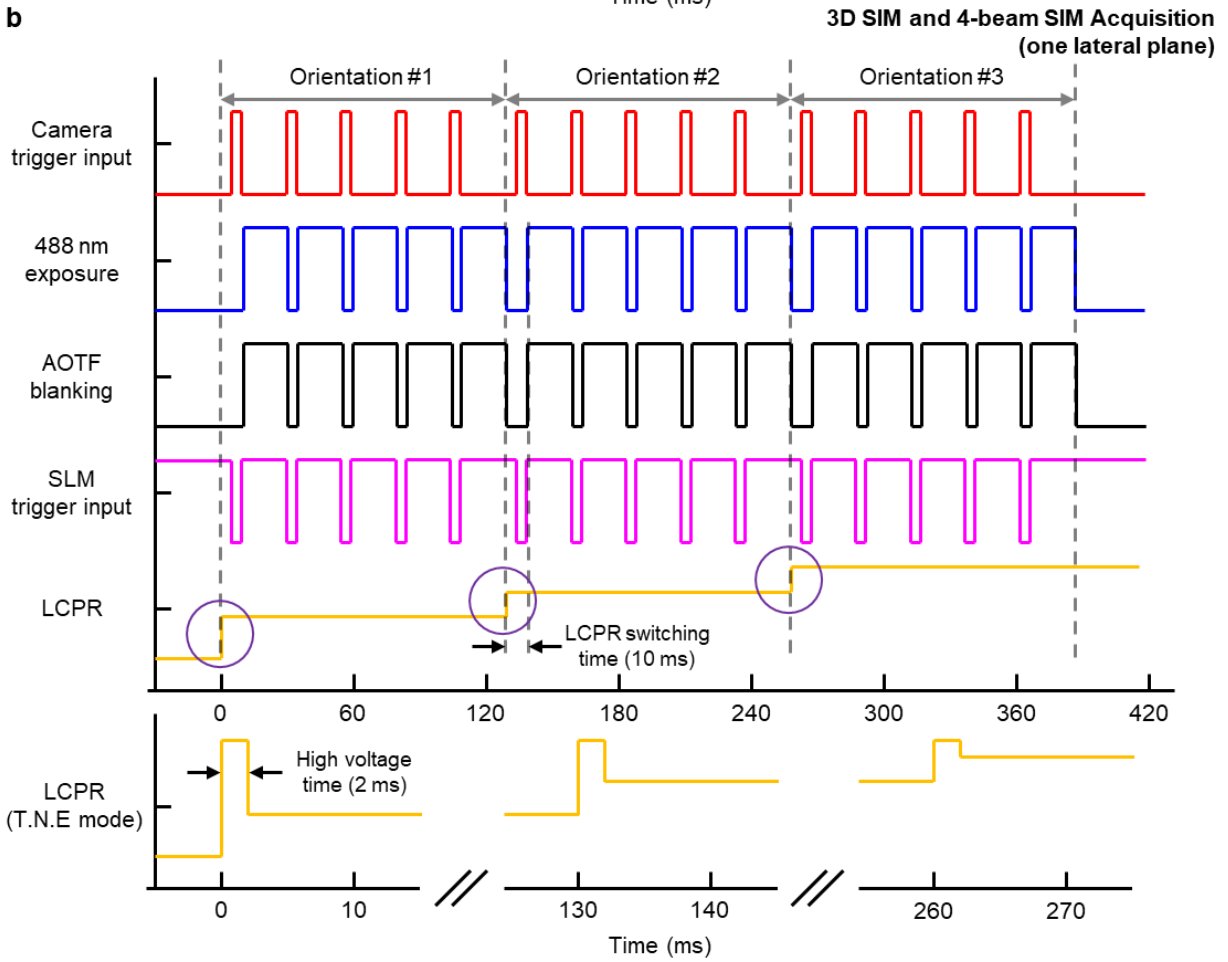



**Supplementary Fig. 5, Timing diagrams for hardware control, single plane acquisition.** Timing diagrams showing control waveforms for **a)** PSF/OTF data acquisition and **b)** 3D SIM and four-beam SIM acquisition at one lateral plane. The ‘Transient Nematic Effect’ (T.N.E.) was used to improve the response time of the LCPR, as shown in **b)**. See also **Methods** for detailed explanation.

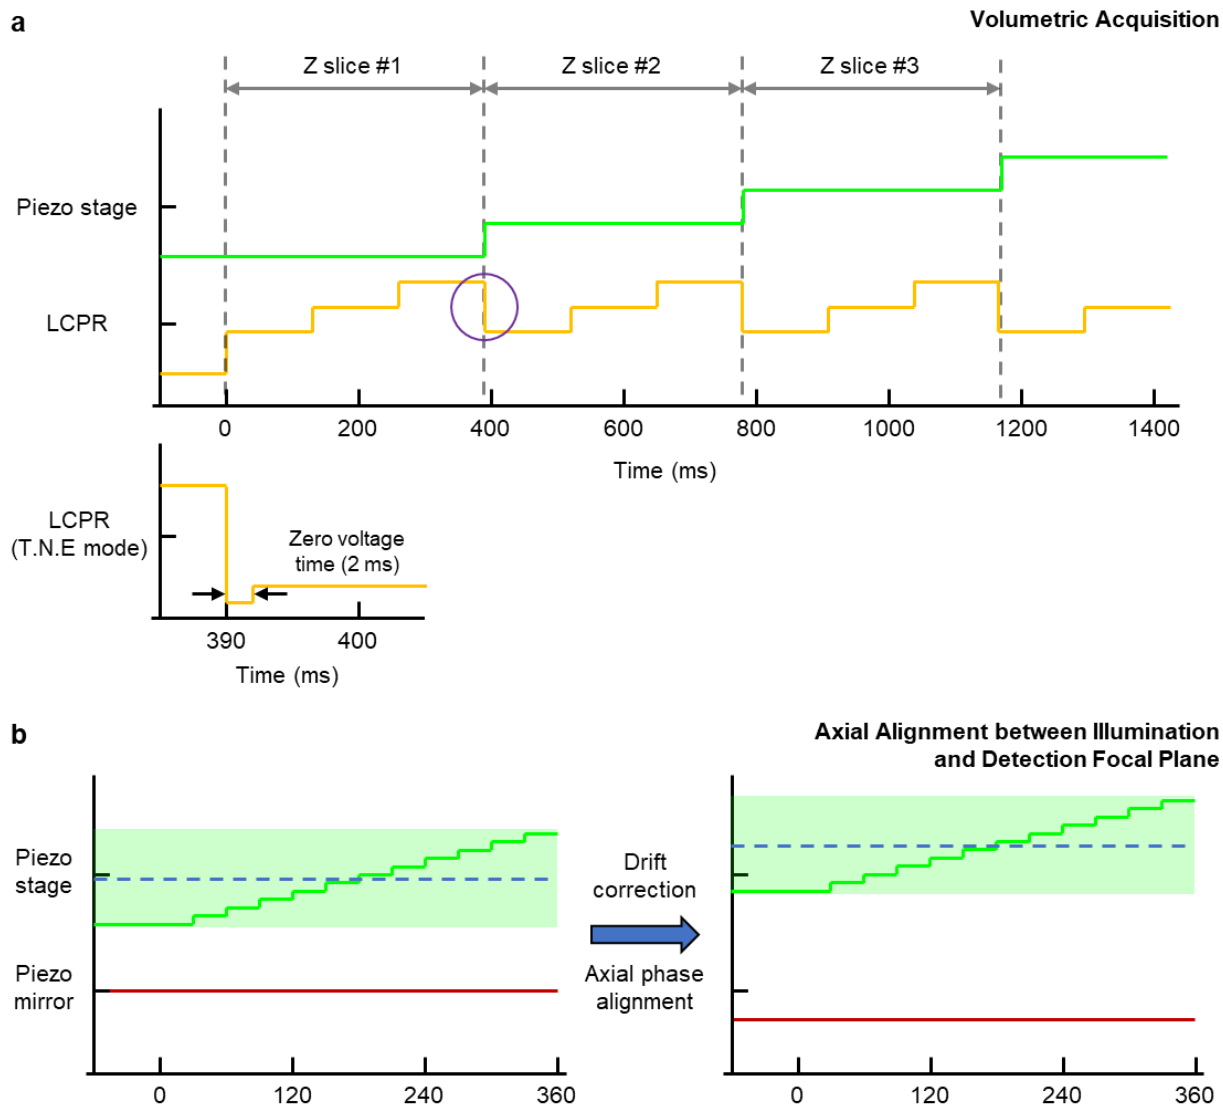

**Supplementary Fig. 6, Timing diagrams for hardware control, volume acquisition.** Timing diagrams showing control waveforms for **a**) 'naive' volumetric acquisition (used for 3D SIM acquisition) and **b**) acquisition after axial phase alignment between illumination and detection focal plane (for example, for four-beam SIM).

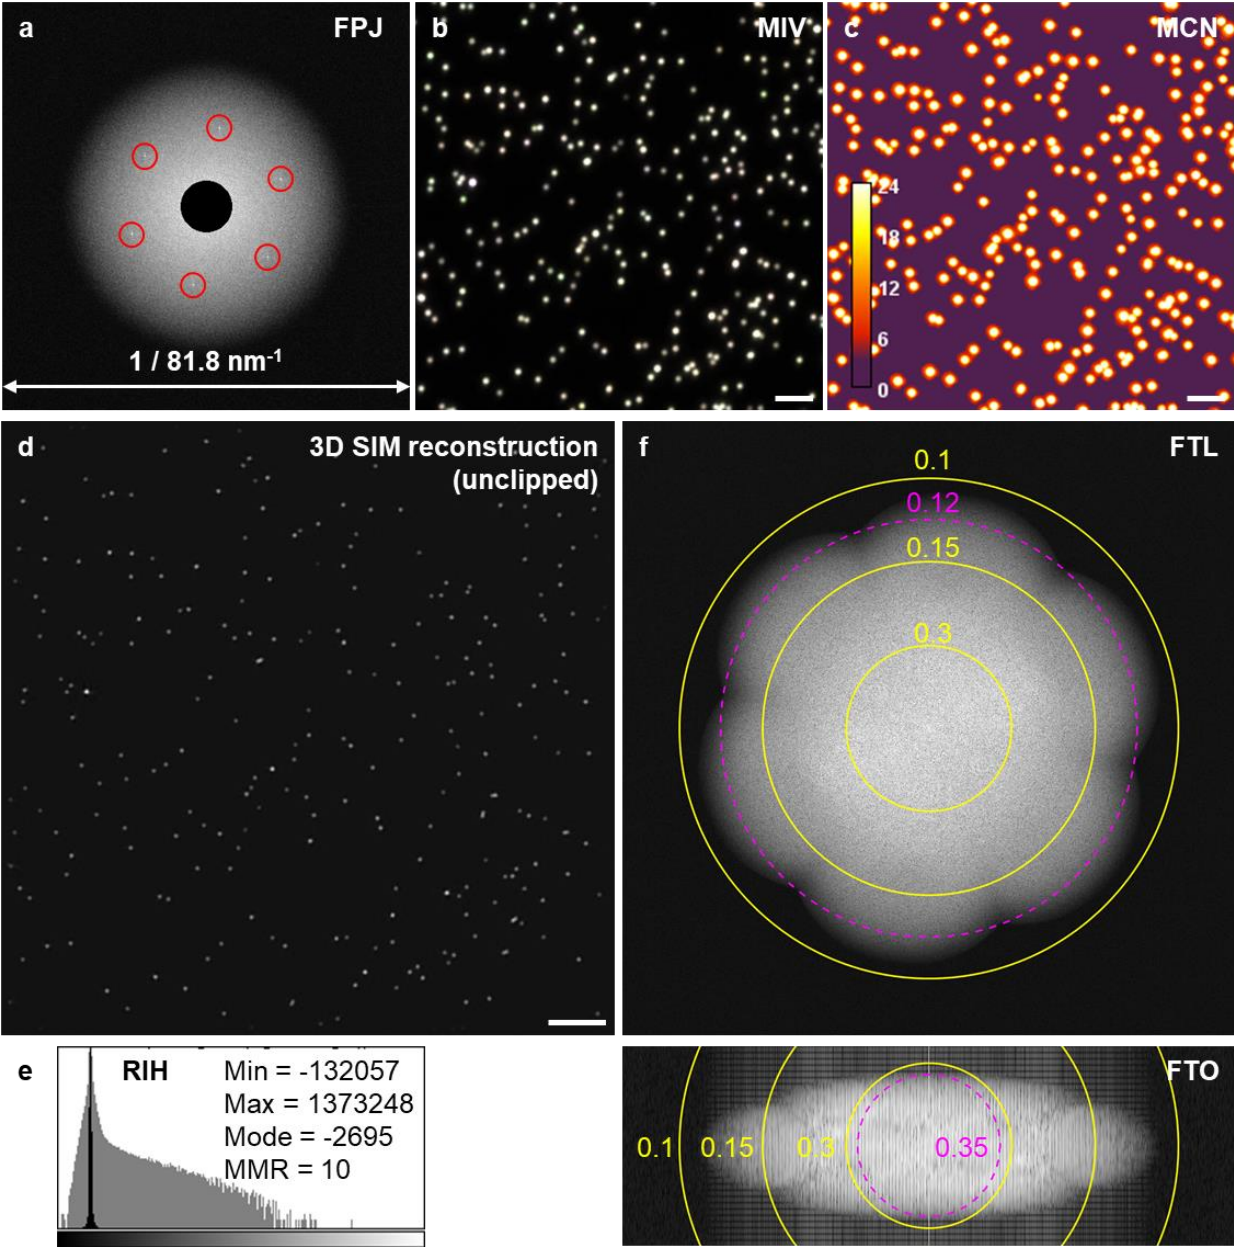

**Supplementary Fig. 7, SIMcheck output for 100-nm yellow-green beads imaged with 1.27 NA water objective.** **a)** ‘Raw Fourier Projection (FPJ)’ of raw 3D SIM input data. The FPJ highlights spots corresponding to the first-order frequencies in the illumination pattern for each orientation. **b)** ‘Motion & Illumination Variation (MIV)’ of raw SIM data. Each orientation is phase-averaged, normalized, and pseudo-colored with cyan, magenta and yellow. The gray- to white-only MIV here demonstrates that there is not significant movement of the beads during SIM acquisition. **c)** ‘Modulation Contrast-to-Noise (MCN)’ of raw SIM data. This function estimates the local modulation contrast. All beads have MCN values larger than 18, which demonstrates excellent modulation contrast. **d)** The reconstructed 3D SIM image (single lateral plane shown) with negative values preserved (unclipped). **e)** ‘Reconstructed Intensity Histogram (RIH)’ of data corresponding to **d)**. Linear-scaled (black) and log-scaled (gray) intensity histograms show the contribution of floating-point values of the reconstructed data. The intensity minima,

maxima, mode and the minimum-to-maximum ratio (MMR) are also shown in the figure. MMR computes the feature intensity relative to the reconstructed noise and intensity dips generated in the reconstruction process. An MMR value of 10 indicates good signal-to-noise ratio. **f)** 'Reconstructed Fourier Plots' of data corresponding to **d)**. 'Fourier Transform Lateral (FTL)' and 'Fourier Transform Orthogonal (FTO)' are log-scaled projections of the 3D FFT of the reconstructed data. Both projections are shown superimposed with the corresponding dimensions in real space (yellow rings and values in microns). The theoretical frequency/resolution limit are also indicated (magenta dashed circles). Scale bars: 2  $\mu\text{m}$ .

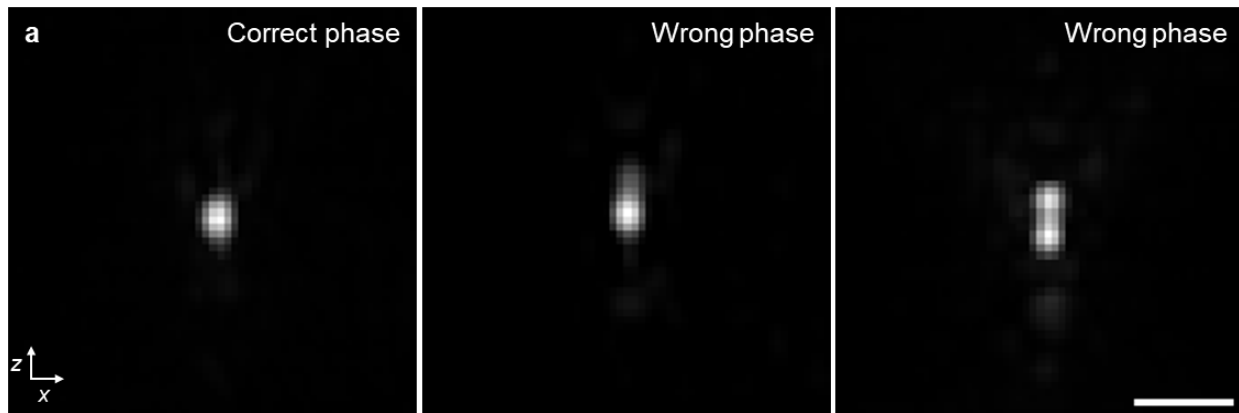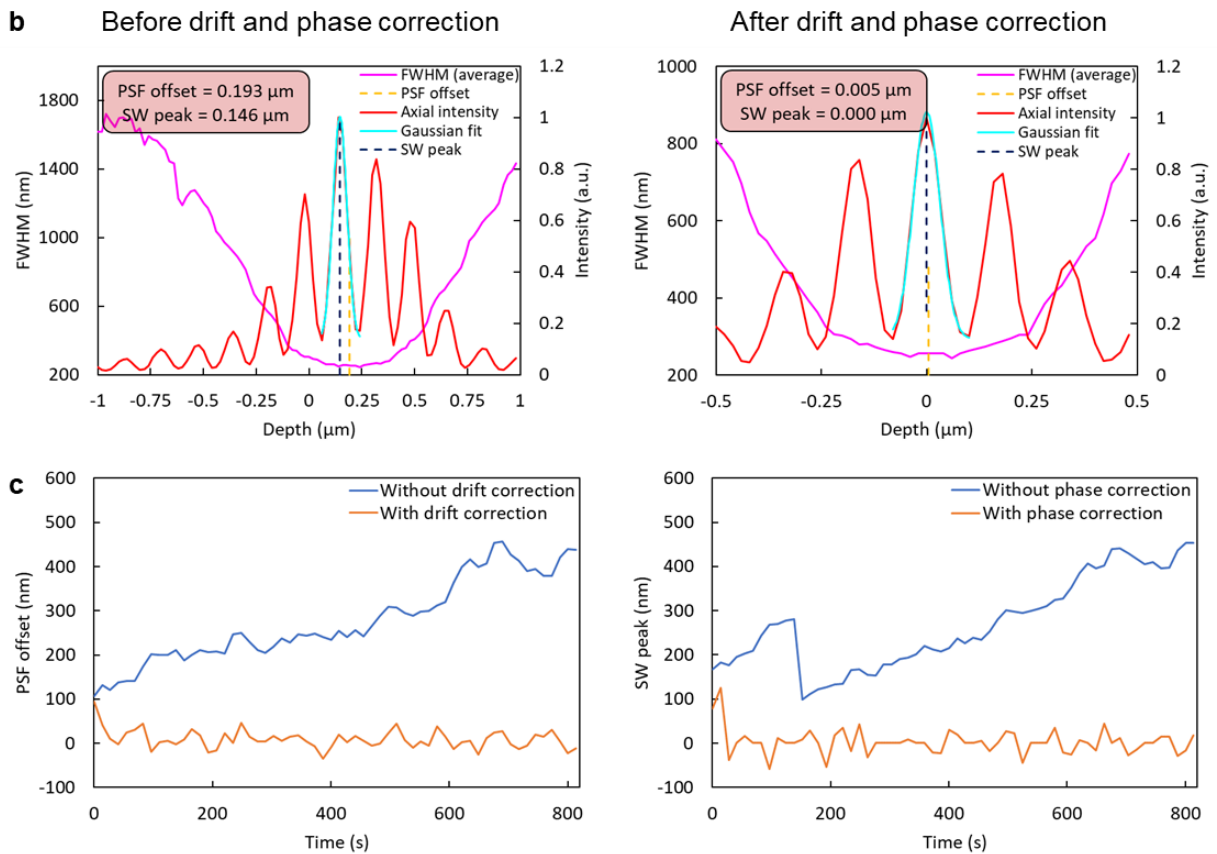

**Supplementary Fig. 8, Drift and relative phase correction for four-beam SIM.** **a**) Image of reconstructed bead after four-beam SIM acquisition with correct (left) and incorrect (middle, right) relative phase between detection plane and illumination pattern maxima. When the phase difference is minimized (left) the bead appears nearly isotropic; progressively larger phase differences culminate in the appearance of a doubled bead (right). Scale bar: 500 nm. **b**) Axial position of standing wave illumination (red, 'Axial intensity') and center of bead (magenta, 'FWHM (average)') before (left) and after (right) drift and relative phase correction. Before correction, the peak standing wave illumination maxima (dark blue dashed line, 'SW peak') and bead position (orange dashed line, 'PSF offset') are offset from the focal plane position and from each other. After correction, bead and illumination maxima are within 5 nm of each other and the focal plane position. **c**) Examples of temporally varying axial bead position drift (left) and illumination (right).

pattern maxima drift (right) with (orange) and without (blue) active correction. Excluding the first three timepoints (when the system is settling), positional standard deviation after active correction is  $s = 18$  nm for bead, 20 nm for illumination pattern maxima versus 91 nm and 103 nm without active correction.

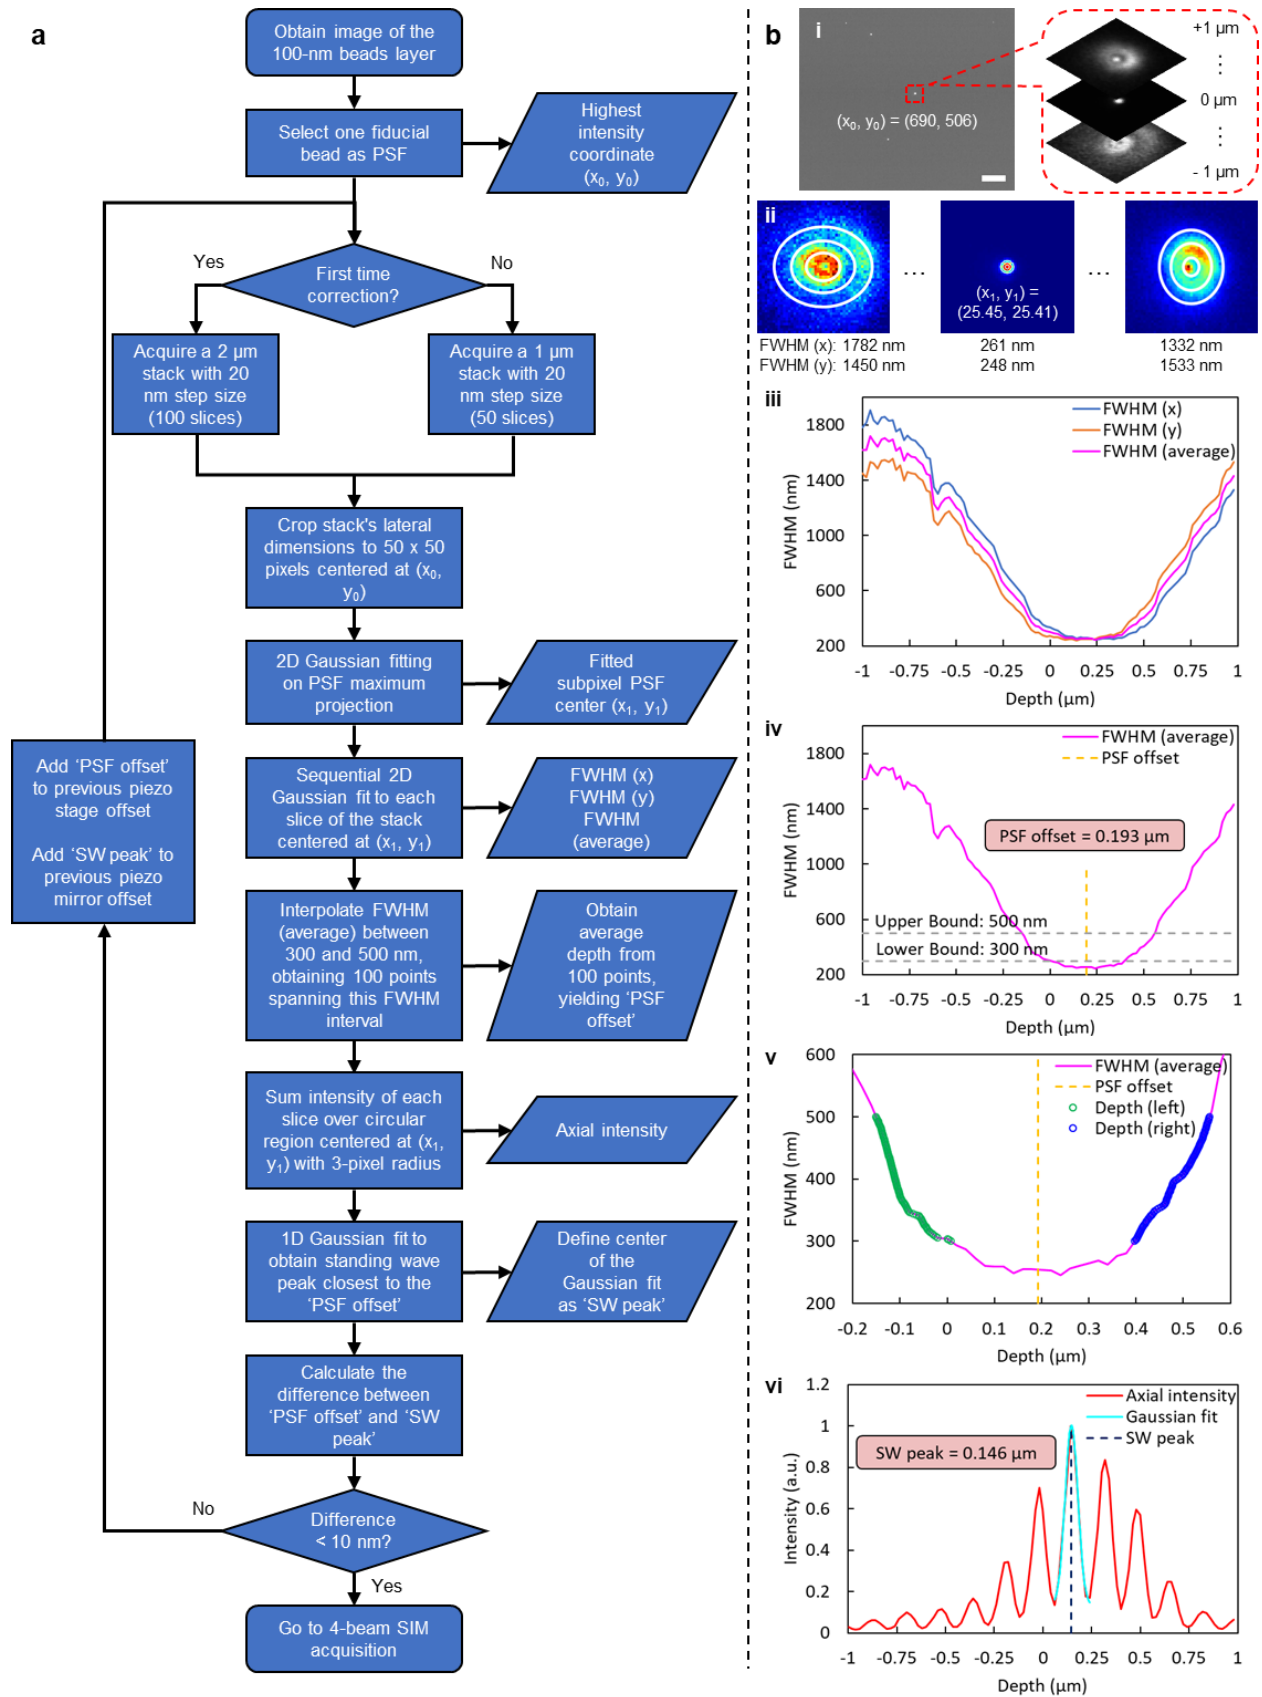

**Supplementary Fig. 9, Bead-based alignment protocol.** **a)** Flowchart showing procedure for updating position of piezo mirror and piezo stage. FWHM: full width at half maximum. See **Methods** for detailed explanation of all steps. **b)** Schematic images and graphs to accompany **a)**. *i)* xy image (left, Scale bar: 10  $\mu\text{m}$ ) and cropped stack (right) of indicated bead. *ii)* Images of selected planes in stack, showing astigmatism and example FWHM(x) and FWHM(y) values. *iii)* FWHM(x), FWHM(y), and average of the two curves. *iv, v)* PSF offset is computed by interpolating FWHM(average) and considering 100 interpolated values spanning for example, from FWHM = 500 nm to FWHM = 300 nm. The midpoints between left and right values for all 100 values are averaged, yielding PSF offset. *vi)* A Gaussian fit on the maxima of the standing wave axial intensity profile is used to find the peak of the standing wave intensity nearest to the PSF offset.



**a**

$$\text{Fluorescence Loss} = \frac{\text{Average Intensity (2nd Image)} - \text{Background}}{\text{Average Intensity (1st Image)} - \text{Background}}$$

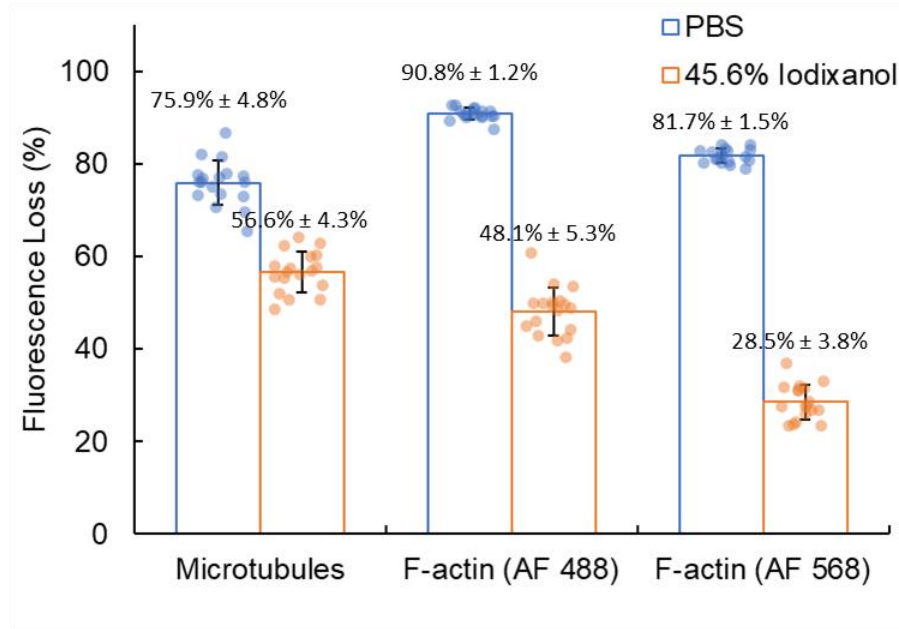

**b**

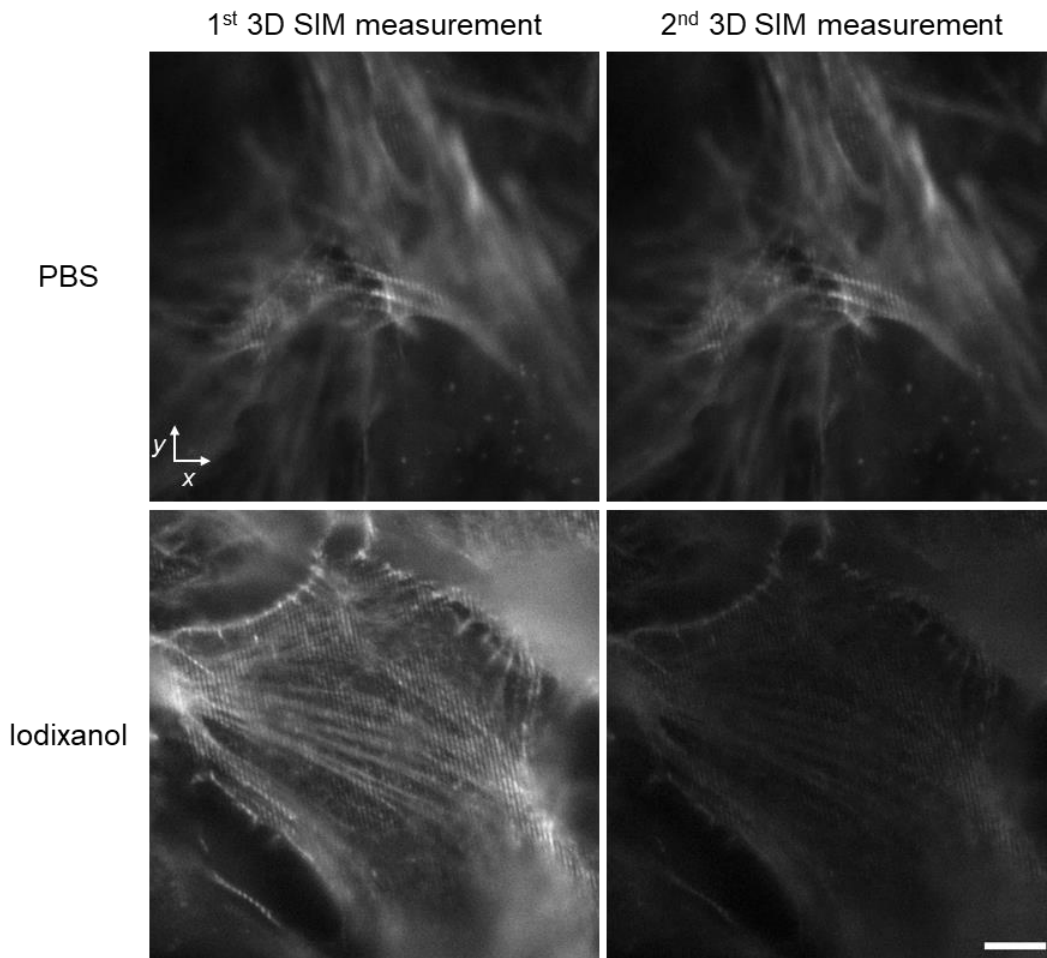

**Supplementary Fig. 10, More bleaching in iodixanol than PBS.** **a)** Comparing loss in fluorescence after 3D SIM imaging twice in PBS (blue) versus 45.6% iodixanol in water (orange). Imaging in iodixanol results in more bleaching in immunolabeled microtubules (left, labeled with Alexa Fluor (AF) 488) and phalloidin-stained F-actin (middle, labeled with AF 488; right, labeled with AF 568). Quantification was performed by selecting areas within images of fixed cells and analyzing according to the indicated ratiometric equation. Data are presented as mean values  $\pm$  SD,  $n = 18$  measurements for microtubules (gathered from 2 cells),  $n = 18$  measurements for AF 488 labeled actin (from 2 cells) and  $n = 18$  measurements for AF 568 labeled actin (from 3 cells). Individual data points are shown as blue and orange dots for PBS and 45.6% iodixanol, respectively. **b)** Example raw frames after first 3D SIM measurement (left) and second 3D SIM measurement (right) of Alexa Fluor 488 labeled F-actin, in PBS (top) and iodixanol (bottom). Scale bar: 5  $\mu\text{m}$ .

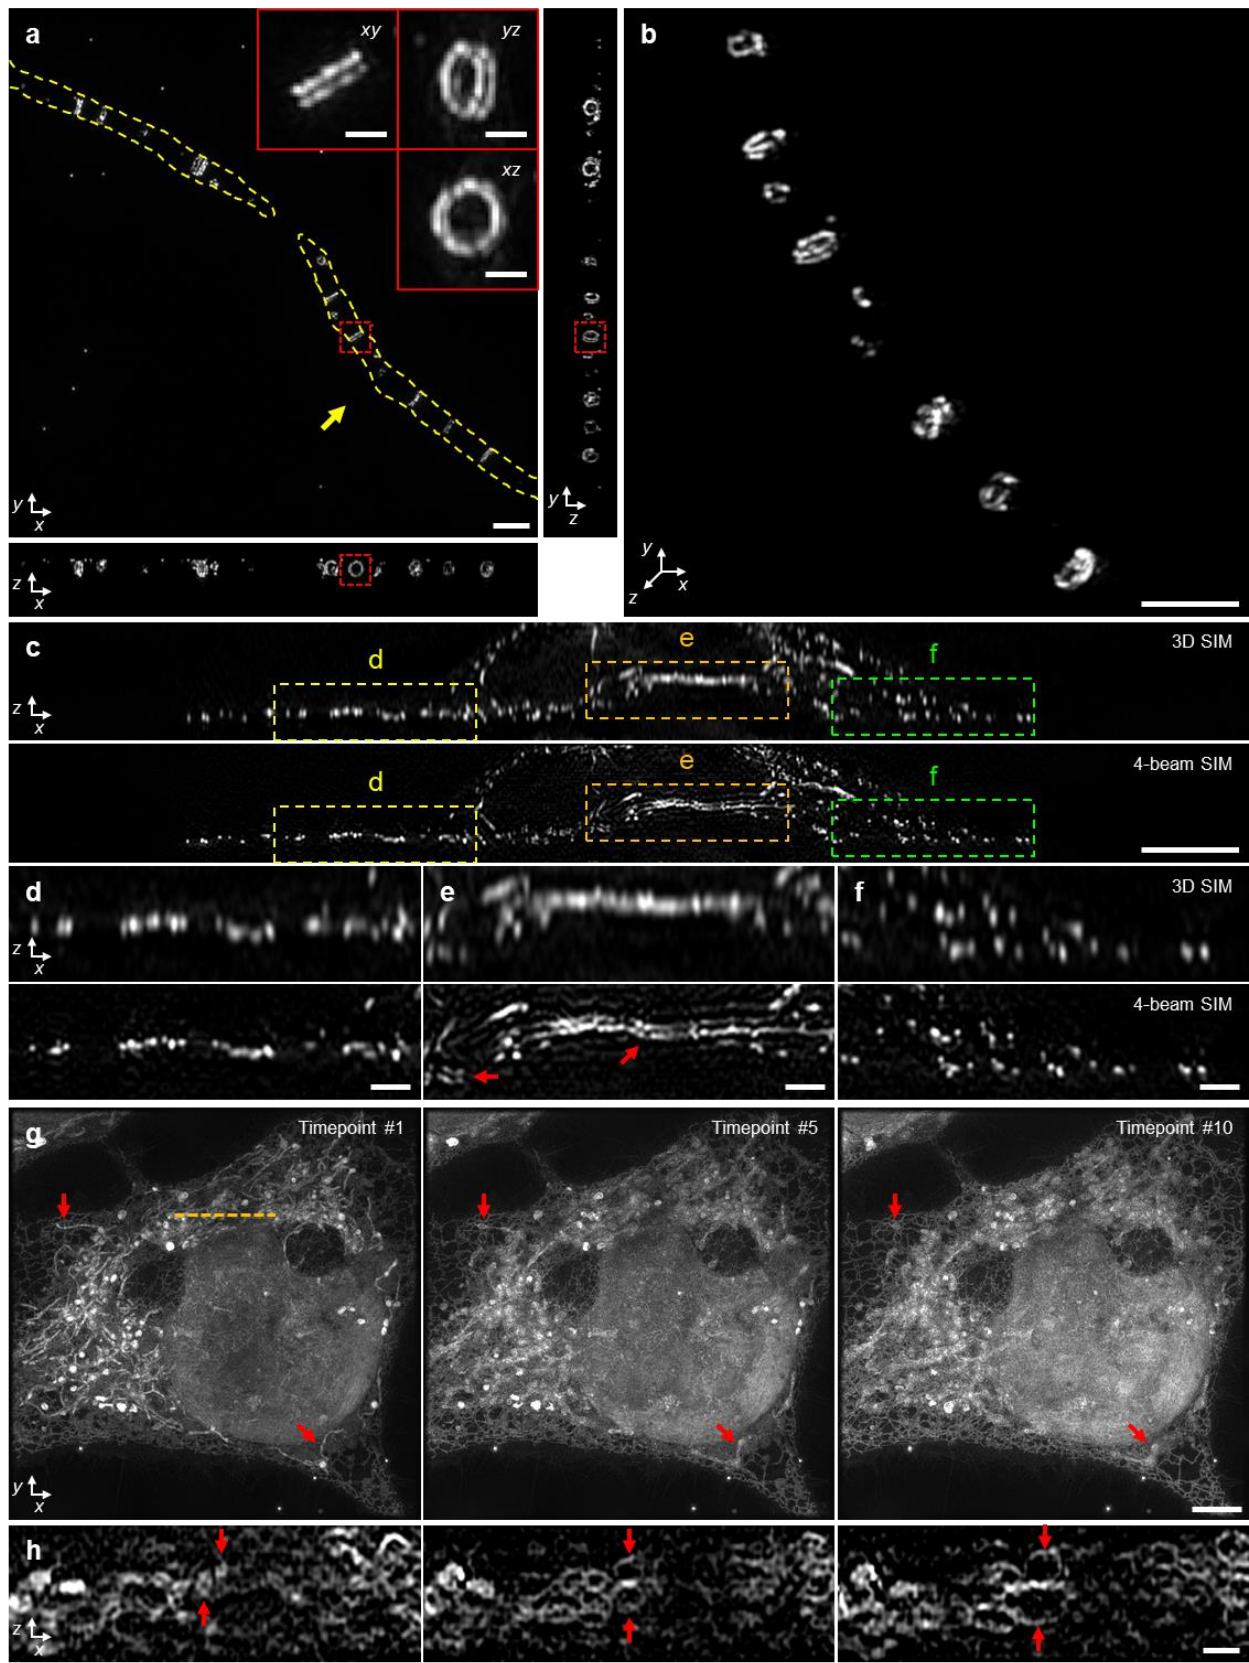

**Supplementary Fig. 11, Additional samples imaged with four-beam SIM, 1.27 NA water immersion lens.**

**a)** Live, vegetative *B. subtilis* with GFP-DivIVA marker. Yellow dashed lines have been added to better delineate cell boundaries. Three maximum intensity projections are shown in lateral and axial views. Insets show higher magnification views of red dashed rectangular regions, indicating clear double rings.

**b)** Three-dimensional maximum intensity projection view of the same cell marked by yellow arrow in **a**). See also **Supplementary Video 5**.

**c)** Axial views of Alexa Fluor 488 immunolabeled microtubules in fixed U2OS cells, as viewed in 3D SIM (top) and four-beam SIM (bottom). Higher magnification views of yellow **d**), orange **e**), and green **f**) dashed rectangular regions are also shown, with red arrows marking 'doubling'/'ringing' artifacts of microtubules at the nuclear boundary, that likely arise due to refractive index mismatch at nuclear boundary.

**g, h)** Live U2OS cell stained with 200 nM Potomac Gold and imaged in four-beam SIM in lateral (**g**, maximum intensity projection) and axial (**h**, single plane corresponding to orange dashed line in **g**). Selected timepoints from a 4D acquisition are shown. Red arrows mark swelling mitochondria, indicating photodamage. See also **Supplementary Video 7**. Scale bars: 2  $\mu\text{m}$  (500 nm for insets) **a, b**); 5  $\mu\text{m}$  **c, g**); 1  $\mu\text{m}$  **d-f, h**).

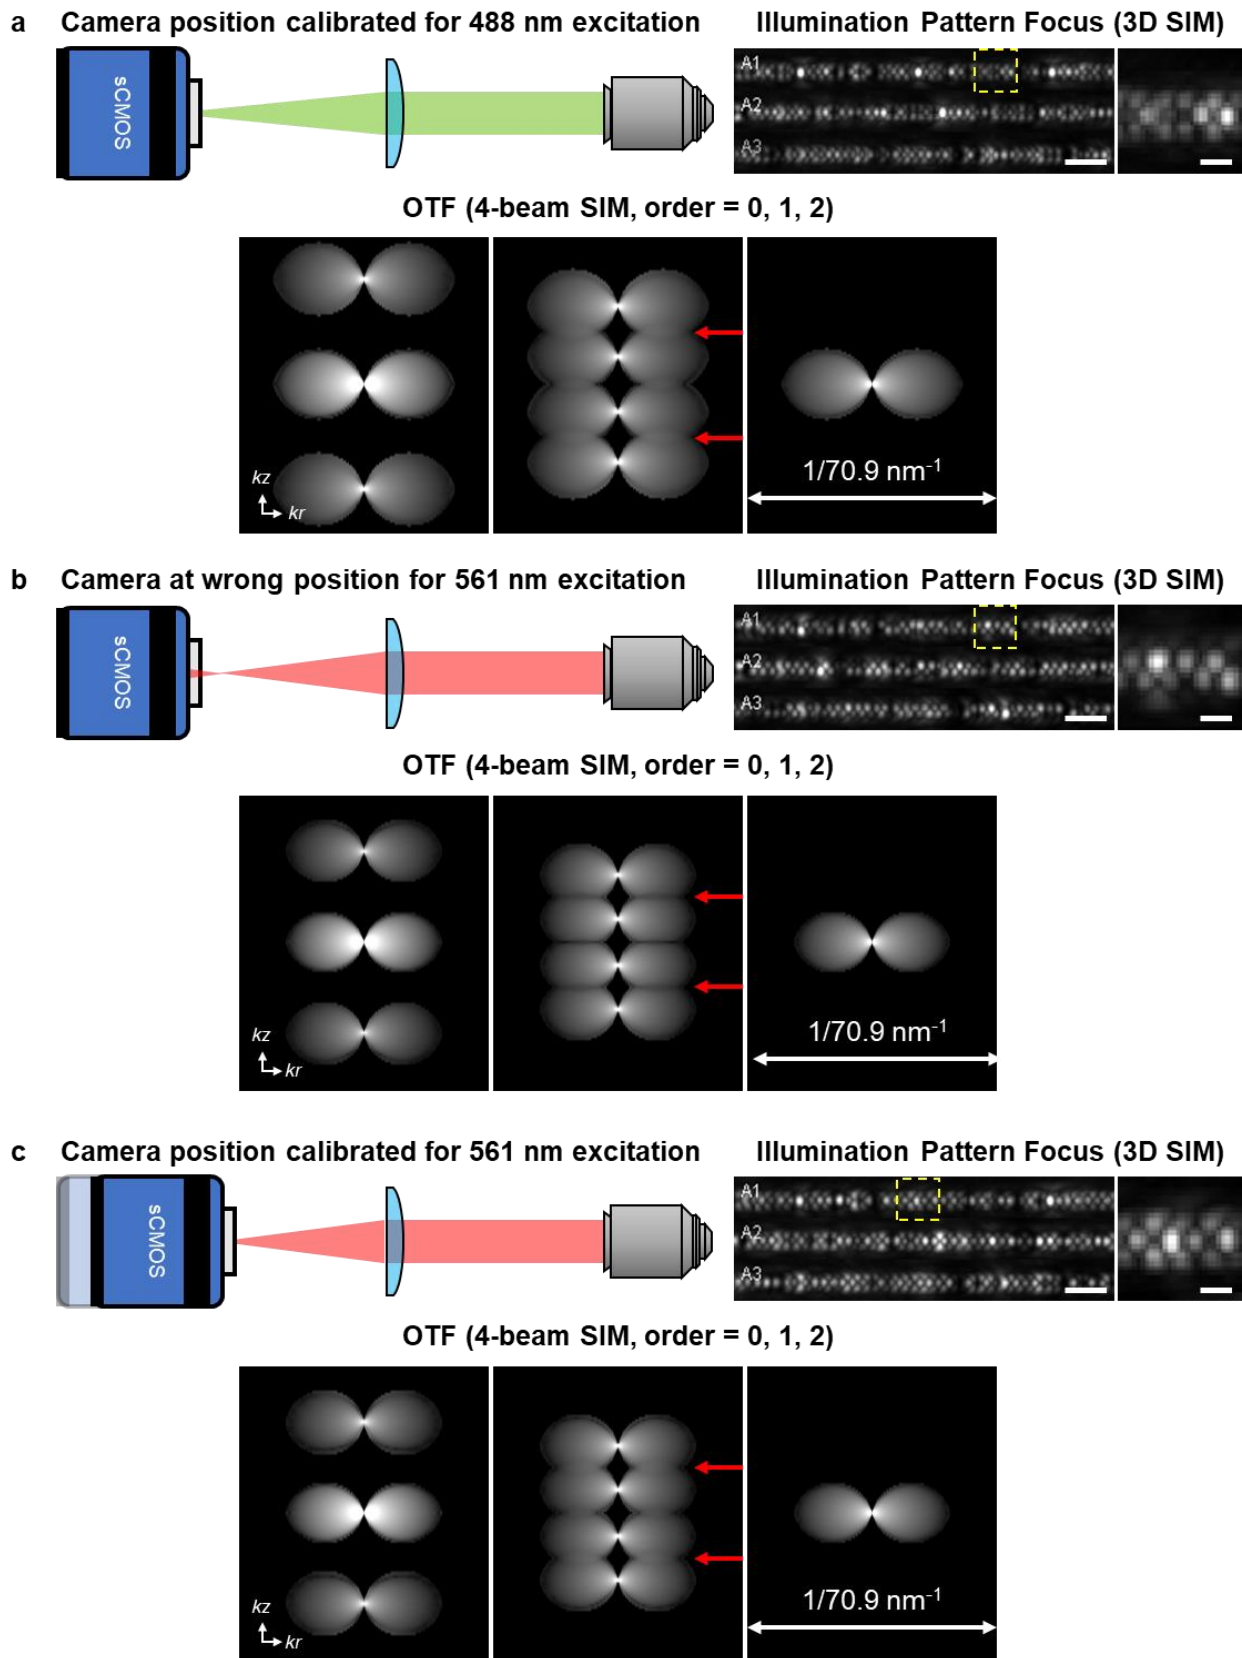

**Supplementary Fig. 12, Adjusting the relative phase between the detector plane and illumination pattern.** **a)** When the camera position (detector plane) is adjusted correctly for the 488 nm illumination pattern, order 1 optical transfer functions (OTFs) overlap (red arrows), producing high quality reconstructions. In practice, we adjust the camera position while monitoring a thin layer of 100-nm yellow-green beads, acquiring 3D SIM data, and passing it through the SIMCheck software. When the illumination pattern is aligned, axial views of beads at each orientation (A1, A2, A3) appear symmetric, with approximately equal energy appearing above and below the central intensity maxima (right, 'Illumination Pattern Focus (3D SIM)'). **b)** When imaging red fluorescent beads excited with 561 nm illumination, if the detector plane is not moved, the beads appear asymmetric, and gaps appear in the order 1 OTF. **c)** Translating the camera restores OTF overlap and beads appear symmetric again. Scale bars: 2  $\mu\text{m}$  lower magnification views, 500 nm higher magnification views of yellow dashed rectangular regions.

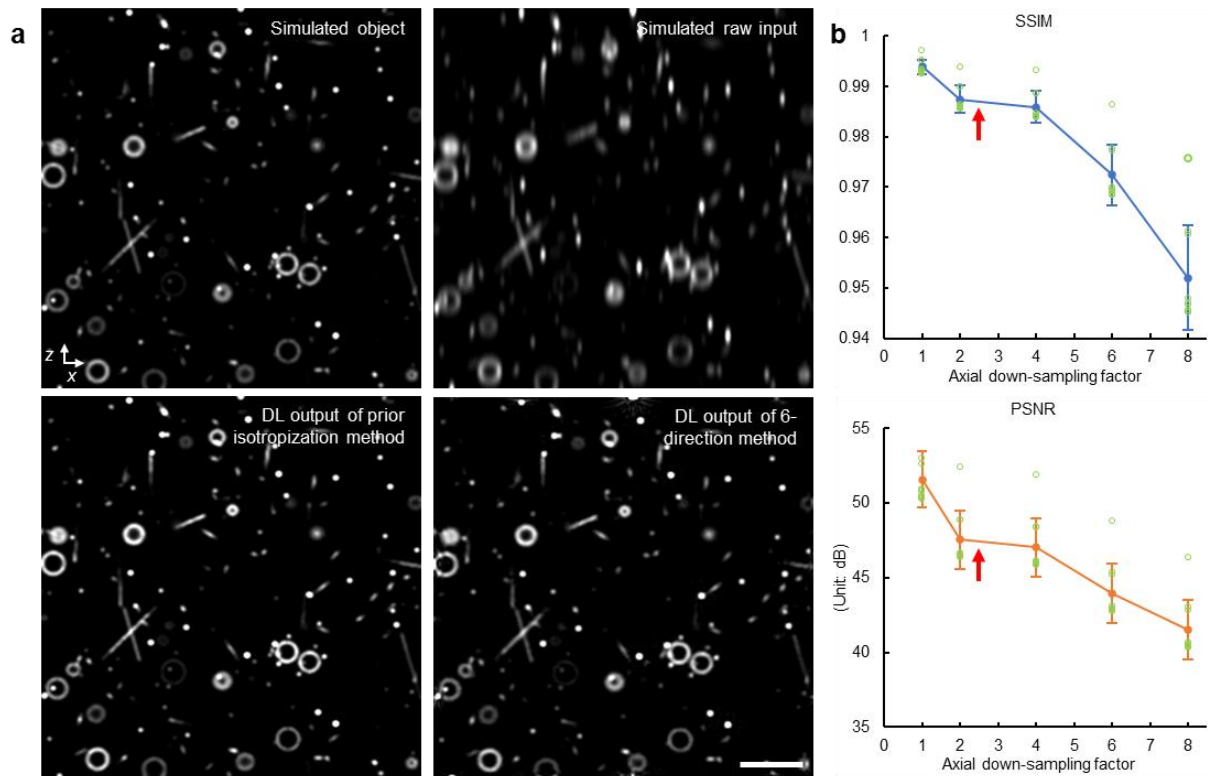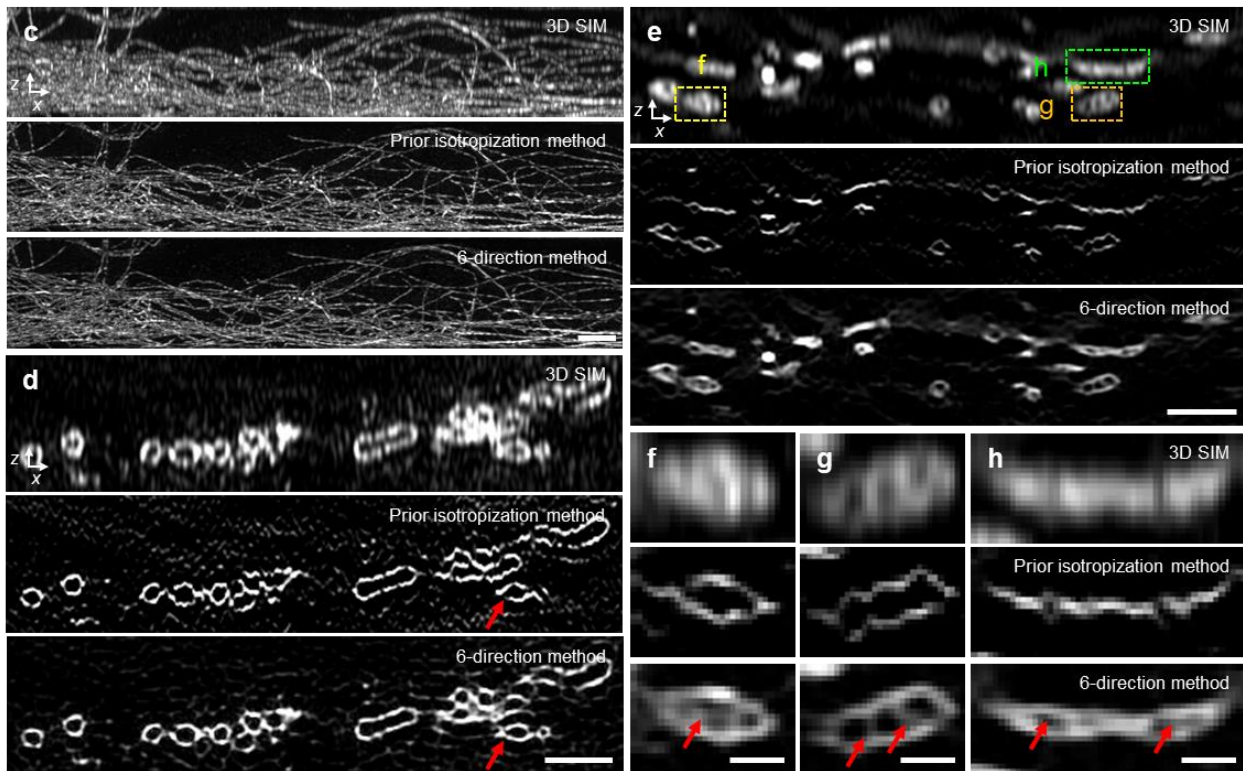

**Supplementary Fig. 13, Comparing methods for network-based isotropization.** a) Simulated objects consisting of lines, points, and hollow spheres (upper left) were blurred and downsampled to simulate 3D SIM data (upper right). Both prior network (lower left, trained only on lateral xy views) and current

network (lower right, which considers six rotated axial views of the sample) produce high quality predictions resembling the ground truth. **b)** Structural similarity index (SSIM) and peak signal-to-noise-ratio (PSNR) as a function of axial downsampling factor, in the six-direction method (data are presented as mean values  $\pm$  SD,  $n = 10$ , individual data points are shown as green circles). Red arrows show downsampling factor used in this work (2.5). **c)** Axial views of immunolabeled microtubules in fixed U2OS cells, as viewed in 3D SIM (top), output of prior network (middle), and current network (bottom). Note close visual similarity between network outputs. **d)** As for **c)**, but images are of immunolabeled Tomm20 in fixed U2OS cells, marking the outer mitochondrial membrane. Red arrows highlight 'breaks' in the membrane that occur in previous network output. **e)** As for **c, d)**, but images show MitoTracker Green FM label in live U2OS cells. **f-h)** Higher magnification views of dashed rectangular regions in **e)**, illustrating features resolved in current work but absent (**f, g**) or distorted (**h**) in others (red arrows). Scale bars: 2  $\mu$ m **a, c-e**); 500 nm **f-h**).



### a Training data generation

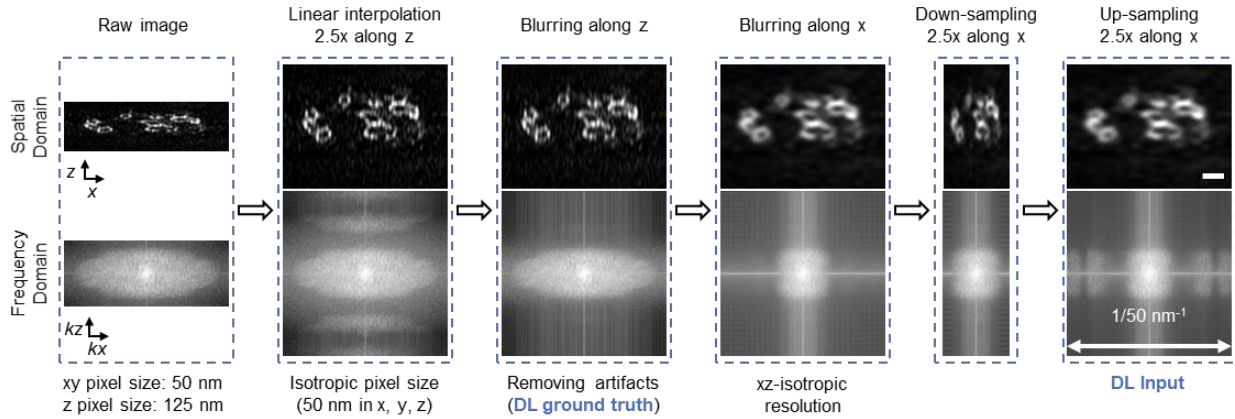

### b Training model

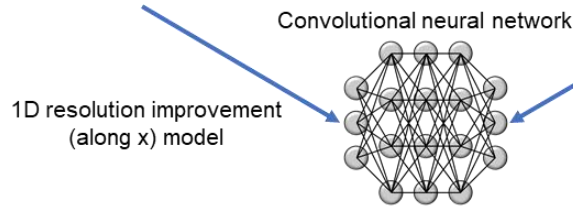

### c Resolution recovery at different rotations

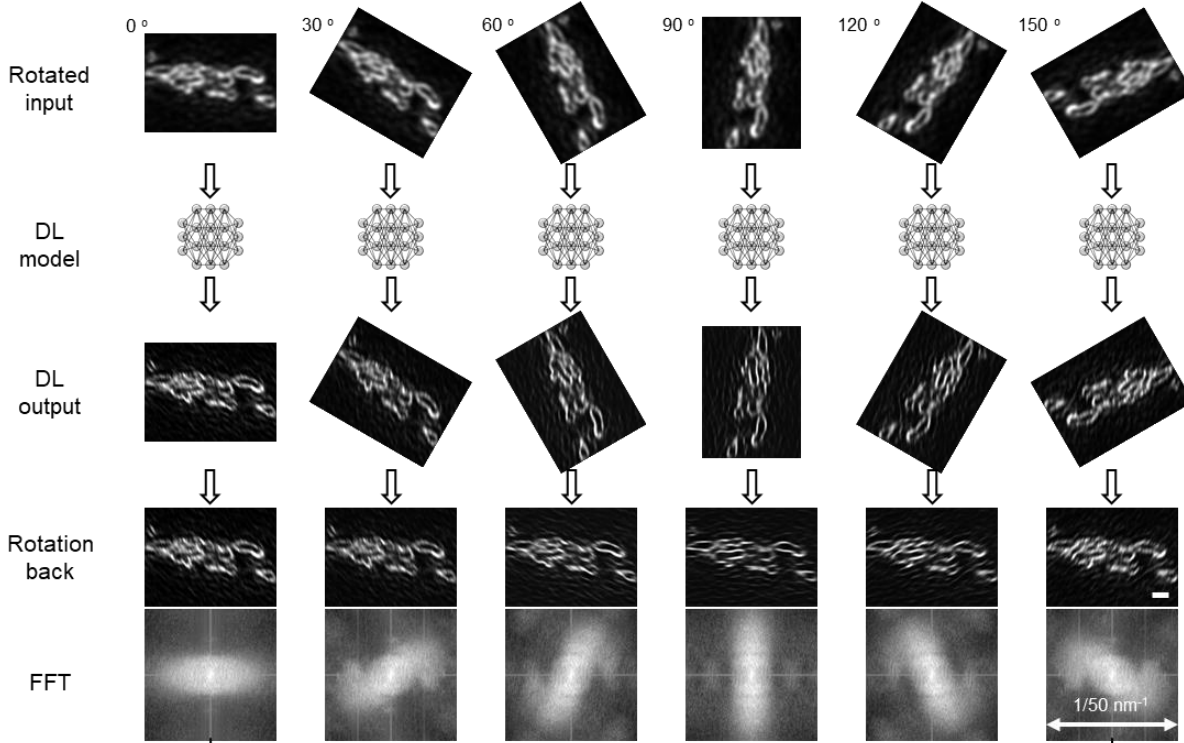

### d Combination of 6 rotations

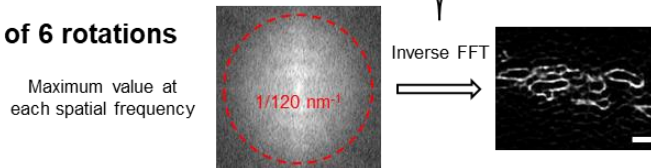

**Supplementary Fig. 14, An improved deep learning method for enhancing axial resolution in 3D SIM data.** **a)** Training data generation. 3D SIM data are interpolated 2.5-fold along the axial (z) dimension to generate isotropic pixels, slightly blurred in the axial direction to remove spurious sidelobes in the Fourier domain, blurred laterally (along x) to generate data with isotropic resolution, downsampled along x to simulate the acquisition of coarsely acquired axial information, and finally upsampled again to recover an isotropic pixel size. A convolutional neural network **b)** is then trained to recover higher resolution lateral information from the degraded data as indicated. Digitally rotating 3D SIM data about the y axis and passing it through the trained network improves resolution along the lateral coordinate in the rotated space; rotating the data back to the original frame then improves resolution along the direction of rotation **c)**. **d)** Recording the maximum value (taken over all rotated outputs in **c)** at each spatial frequency generates a final prediction with isotropic ~120 nm resolution **d)**. All real space scale bars 1  $\mu\text{m}$ ; in this example 3D SIM images show Alexa Fluor 488 immunolabeled Tomm20, marking mitochondria, in fixed U2OS cell. See also **Fig. 4a, Methods**.

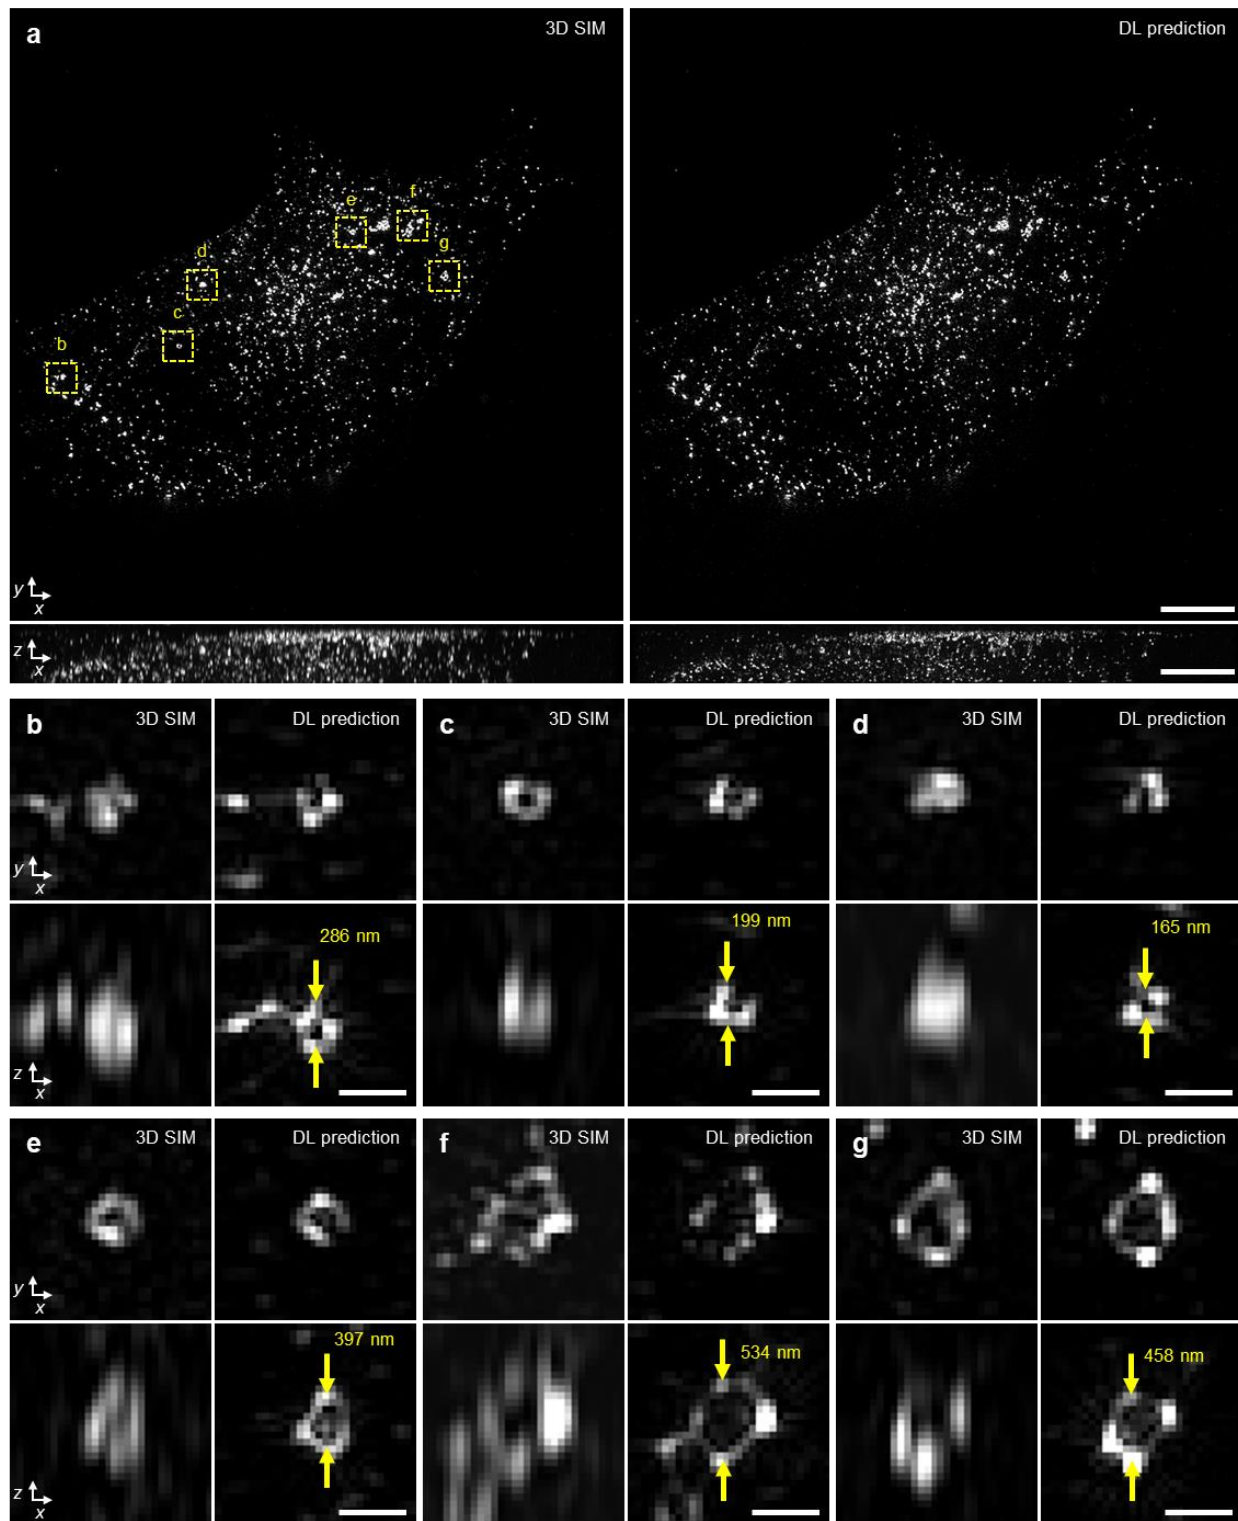

**Supplementary Fig. 15, Caveolin-1-EGFP decorates ring structures of variable diameter in fixed mouse embryonic fibroblasts. a)** 3D SIM images (left) and accompanying deep learning prediction (right). Lateral (top) and axial (bottom) maximum intensity projections are shown. **b-g)** Higher magnification

views of yellow dashed rectangular regions in **a)**, highlighting ring structures of variable diameter. Apparent ring diameters are marked on axial views. Scale bars: 5  $\mu\text{m}$  **a)**; 500 nm **b-f)**.

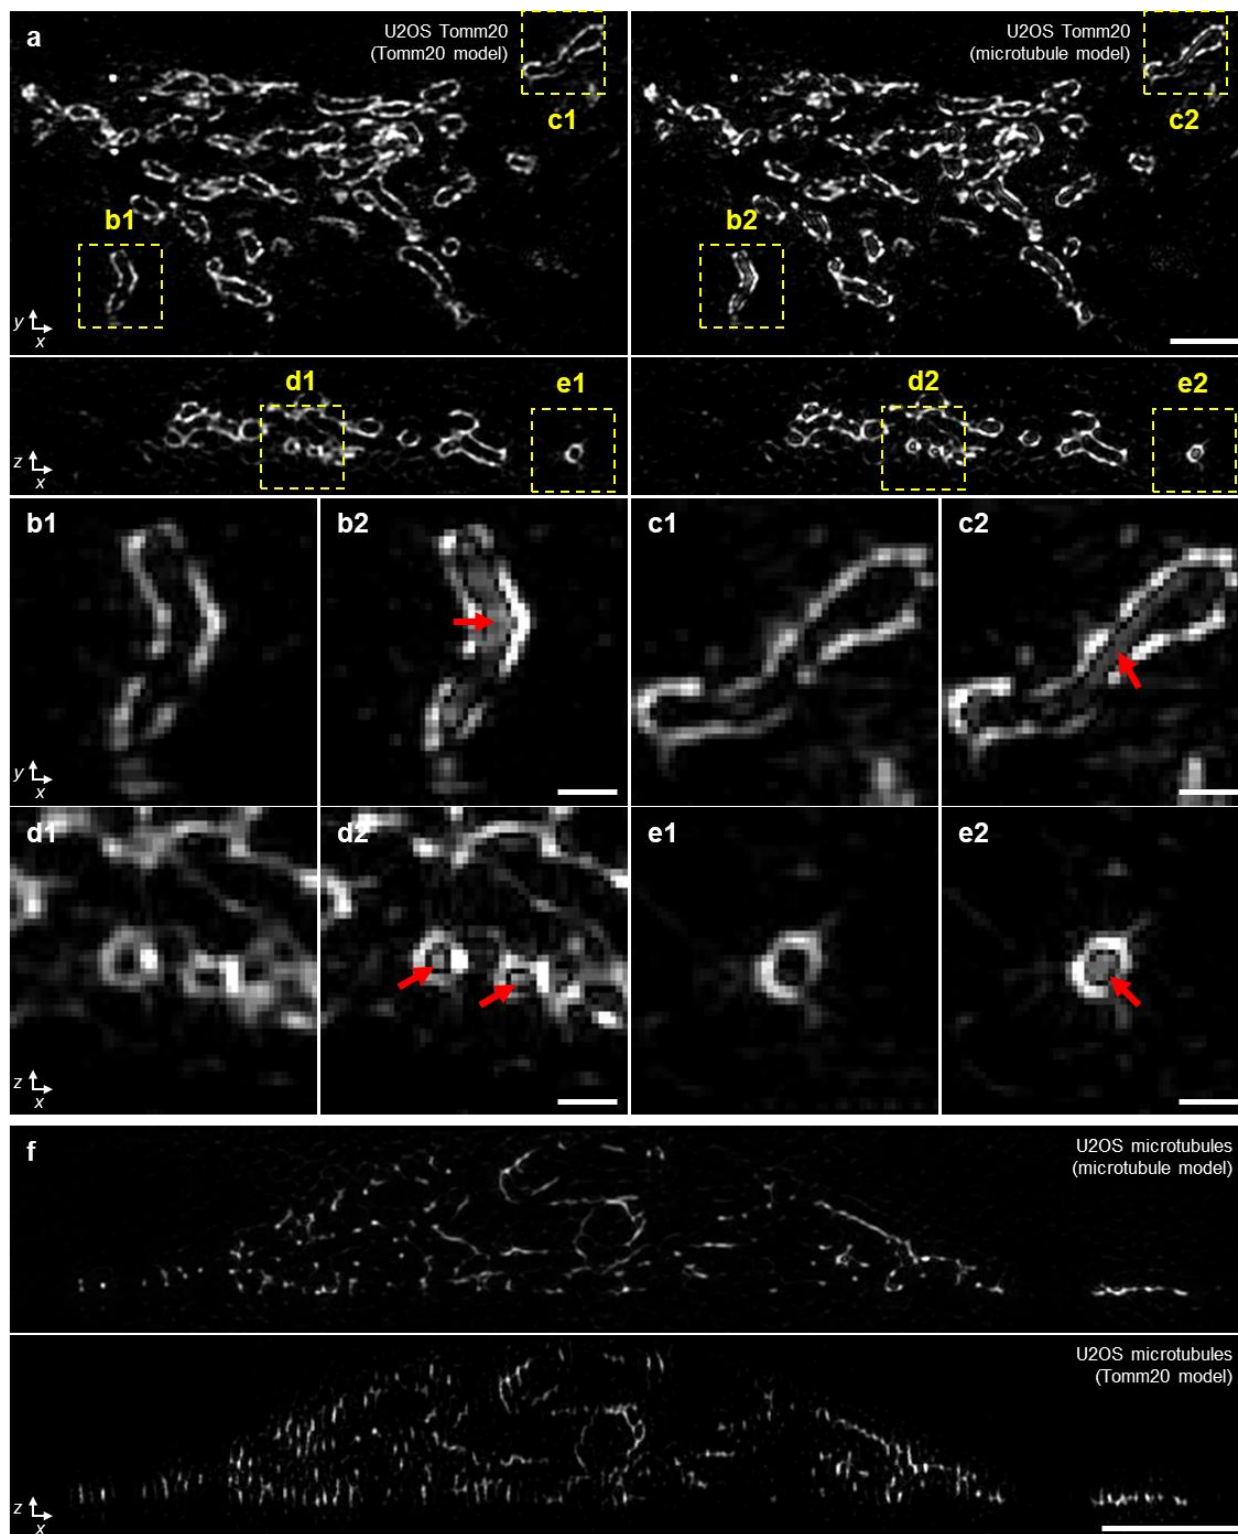

**Supplementary Fig. 16, Using mismatched training data degrades prediction quality in deep learning isotropization.** a) Selected volumetric reconstructions of immunolabeled Tomm20 in fixed U2OS cells using model derived from Tomm20 training data (left) or microtubule training data (right) applied to the same 3D SIM input. Lateral (top) and axial (bottom) single slices of DL predictions are shown. **b-e)**

Although the overall morphologies of mitochondria are maintained, higher magnification views of yellow dashed rectangular regions in **a**) reveal artifacts that arise within the mitochondria (red arrows) when using mismatched training data. **f**) Axial views of immunolabeled microtubules in fixed U2OS cells, reconstructed with isotropization models trained on microtubules (top) versus Tomm20 data (bottom) applied the same 3D SIM input. Microtubules are distorted and axial resolution is reduced when using mismatched training data. Scale bars: 2  $\mu\text{m}$  **a**); 500 nm **b-e**), 4  $\mu\text{m}$  **f**).

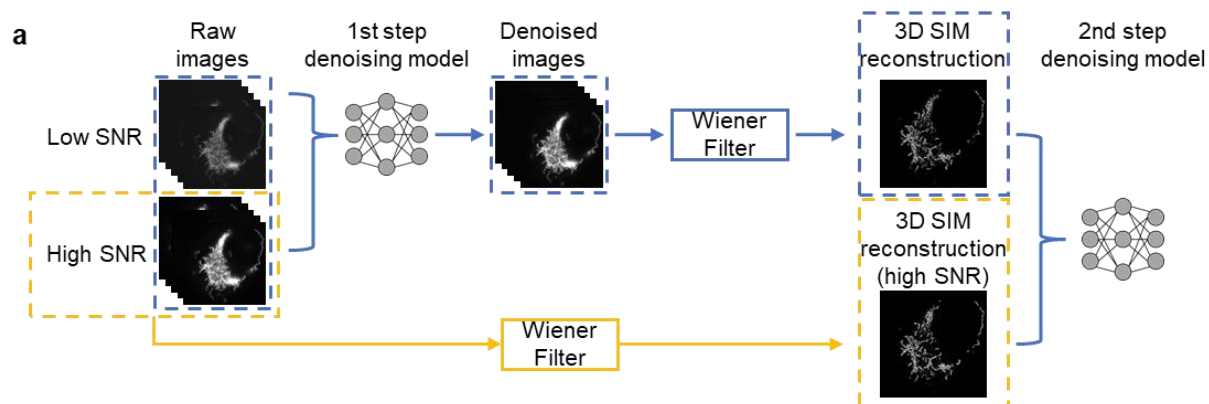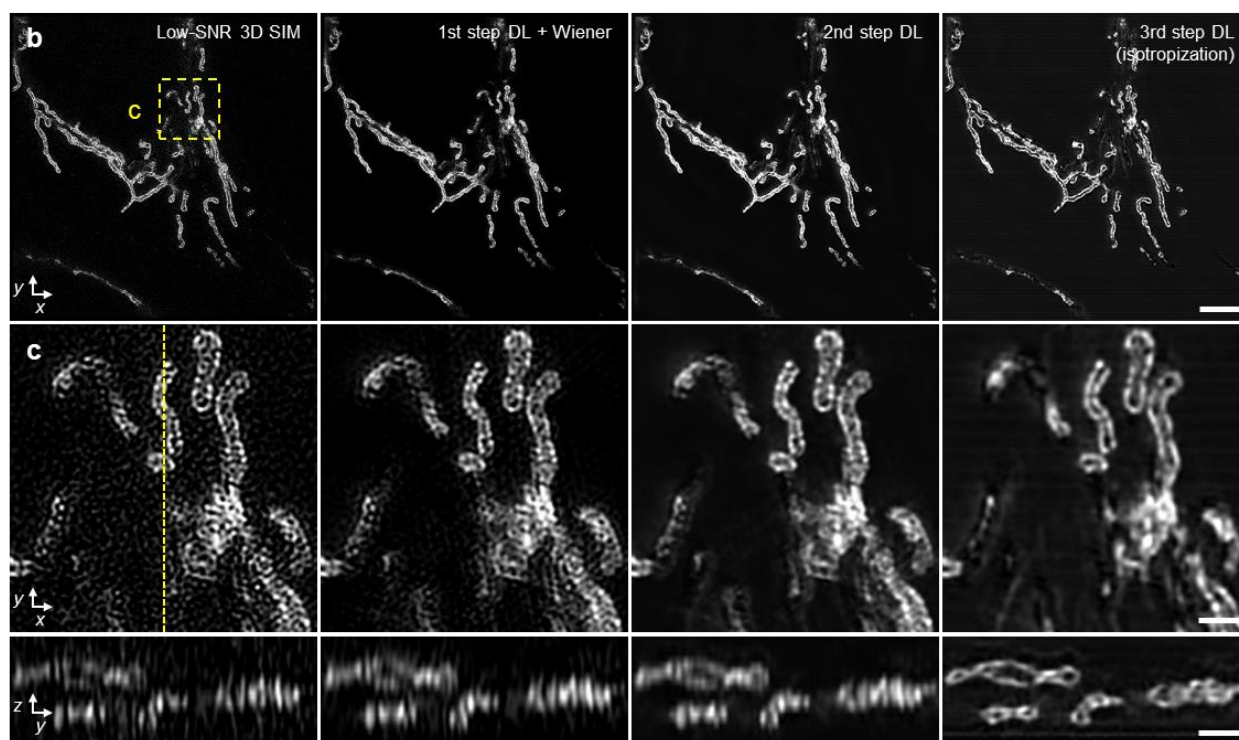

**Supplementary Fig. 17, Multi-step deep learning for denoising and resolution isotropy.** **a)** Training procedure. Matched sets of raw data (5 phases  $\times$  3 orientations) are collected at high and low signal-to-noise ratio (SNR) and are used to train a denoising model (1<sup>st</sup> step denoising) to denoise low SNR data. A second denoising model (2<sup>nd</sup> step denoising) is trained using the 3D SIM reconstructions derived from generalized Wiener filters that (1) combine the denoised images from the 1<sup>st</sup> denoising step or (2) combine the high SNR raw data. The output of this second model may then be fed into a third model that enhances axial resolution, generating a final denoised reconstruction with isotropic resolution. See also **Fig. 5a**, **Supplementary Figs. 18, 19**. **b)** Comparative images (single planes) of immunolabeled Tomm20 in a fixed U2OS cell, as observed after (left to right): direct 3D SIM reconstruction from the low SNR raw data; after application of the 1<sup>st</sup> denoising model and Wiener filter; after application of the 2<sup>nd</sup> denoising model; and after the isotropization model. **c) Top:** Higher magnification views of yellow dashed rectangular region in **b)**, emphasizing progressive improvement in SNR; **Bottom:** axial view corresponding to yellow dashed line in top view. Scale bars: 5  $\mu\text{m}$  **b)**, 1  $\mu\text{m}$  **c)**.

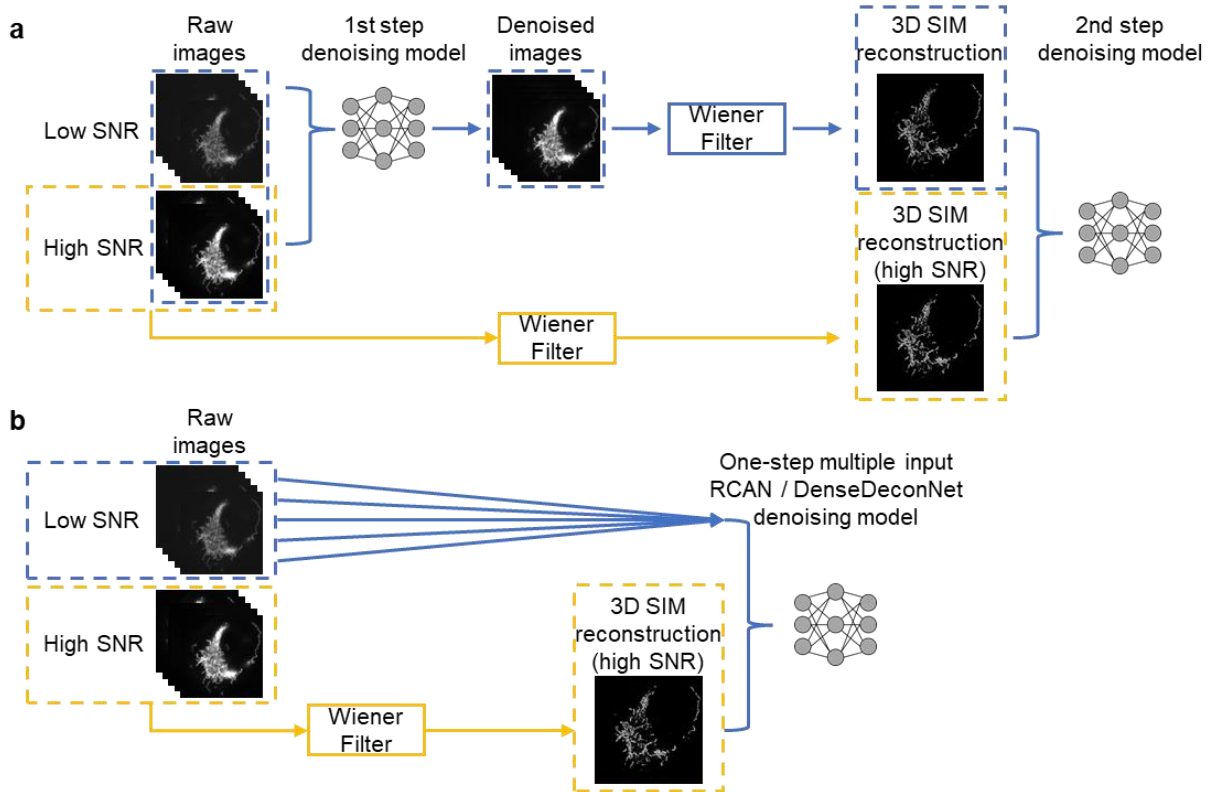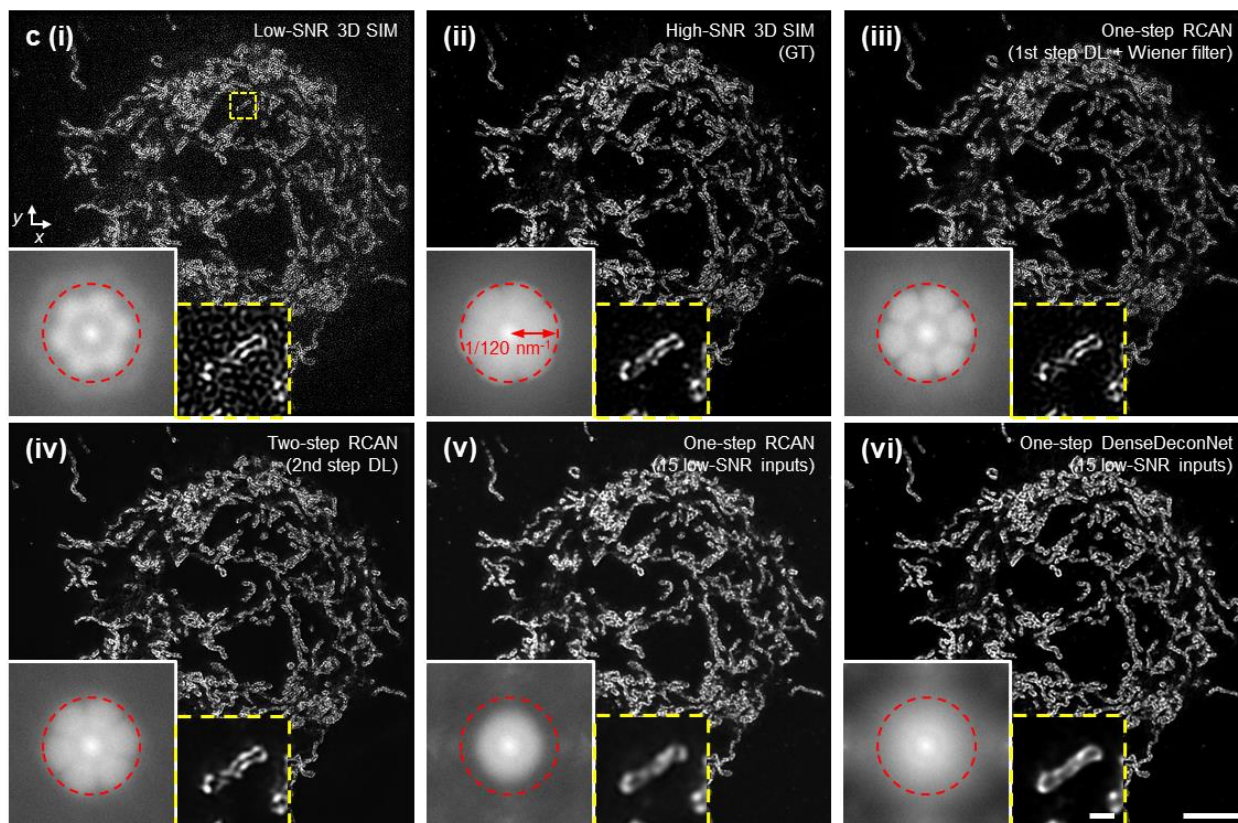



**Supplementary Fig. 18, Comparing different denoising methods.** **a)** Two step denoising method incorporating Wiener filter, reproduced from **Supplementary Fig. 17a**. This is the method used in the main text, see also **Fig. 5a**. **b)** multiple-input one-step denoising, trained using raw data (5 phases x 3 orientations = 15 inputs) and high SNR 3D SIM ground truth reconstruction. The model is either a multiple input RCAN or a multiple input DenseDeconNet. **c)** Comparative images of immunolabeled Tomm20 in a fixed U2OS cell, as reconstructed i) directly from the raw, input using a generalized Wiener filter; ii) using high SNR input data, i.e., ground truth (GT); iii) one-step RCAN denoising followed by application of the Wiener filter; iv) as in iii), but followed by the 2<sup>nd</sup> denoising step, i.e., two-step RCAN denoising incorporating the Wiener filter; v) one-step RCAN using 15 low SNR inputs, as shown in **b)**; vi) one-step DenseDeconNet using 15 low SNR inputs, as shown in **b)**. Insets show Fourier transforms of the images and higher magnification views of mitochondria in dashed yellow box in **c (i)**. Structural similarity index measure (SSIM) and peak signal-to-noise ratios are also provided in **Supplementary Table 3**, assuming high SNR 3D SIM reconstruction **c (ii)** as ground truth. Scale bars: 5  $\mu$ m, 500 nm (inset).

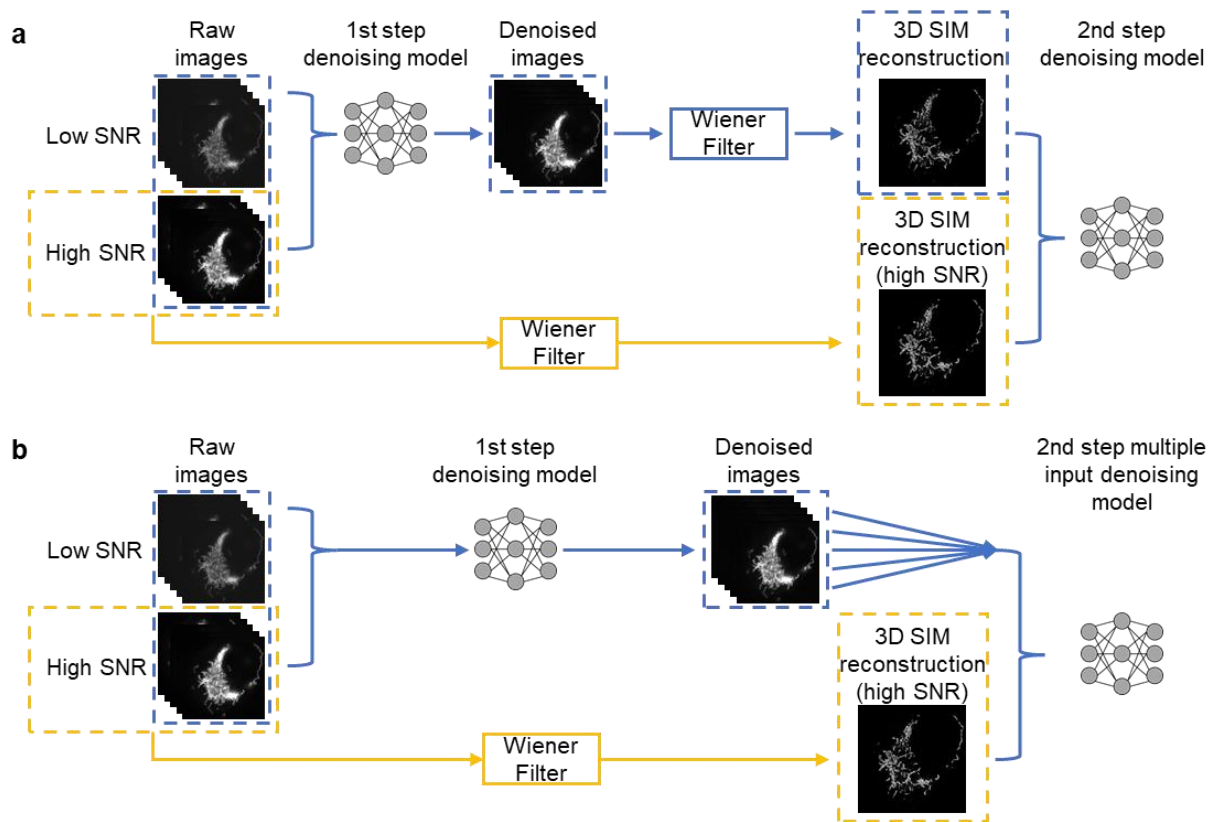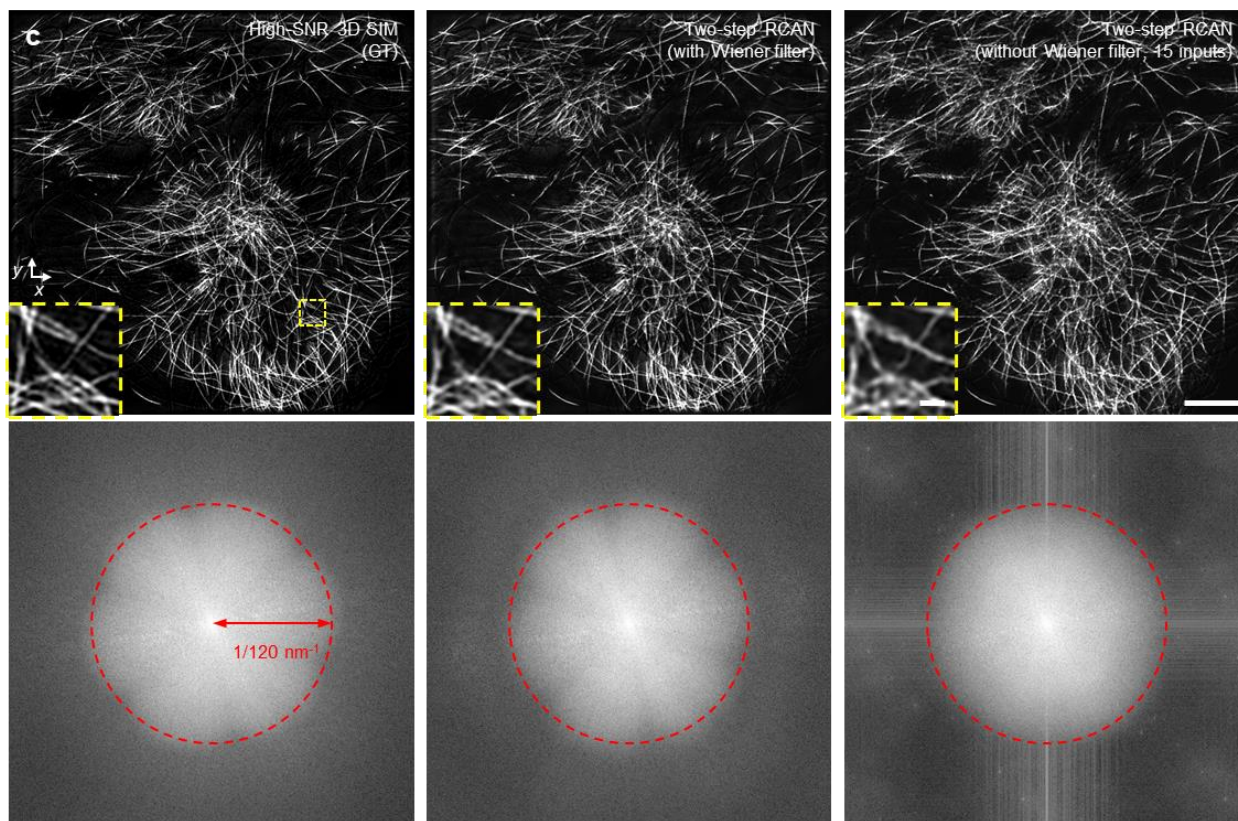

**Supplementary Fig. 19, Incorporating the Wiener filter between denoising steps improves the performance of two-step denoising.** **a)** Two step denoising method incorporating Wiener filter, reproduced from **Supplementary Fig. 17a**. This is the method used in the main text, see also **Fig. 5a**. **b)** As in **a)**, but without applying the Wiener filter to the output of the first step, instead using the 15 denoised images as input into the 2<sup>nd</sup> step. **c) Top:** Comparative images of immunolabeled microtubules in fixed U2OS cells, as observed after (left to right): performing 3D SIM reconstruction on high SNR raw input, i.e., the ground truth (GT); after applying two-step RCAN with intermediate Wiener filter, i.e., process illustrated in **a)**; after applying 2<sup>nd</sup> RCAN model to set of 15 denoised input images without Wiener filter, i.e., process illustrated in **b)**. Insets show higher magnification view of immunolabeled microtubules in yellow dashed rectangular region. **Bottom:** Corresponding Fourier transforms. Note that although Fourier transforms are similar, insets reveal detail lost without Wiener filter. See also the corresponding structural similarity index measure (SSIM) and peak signal-to-noise ratios in **Supplementary Table 4**. Scale bars: 5  $\mu\text{m}$ , 500 nm (inset).

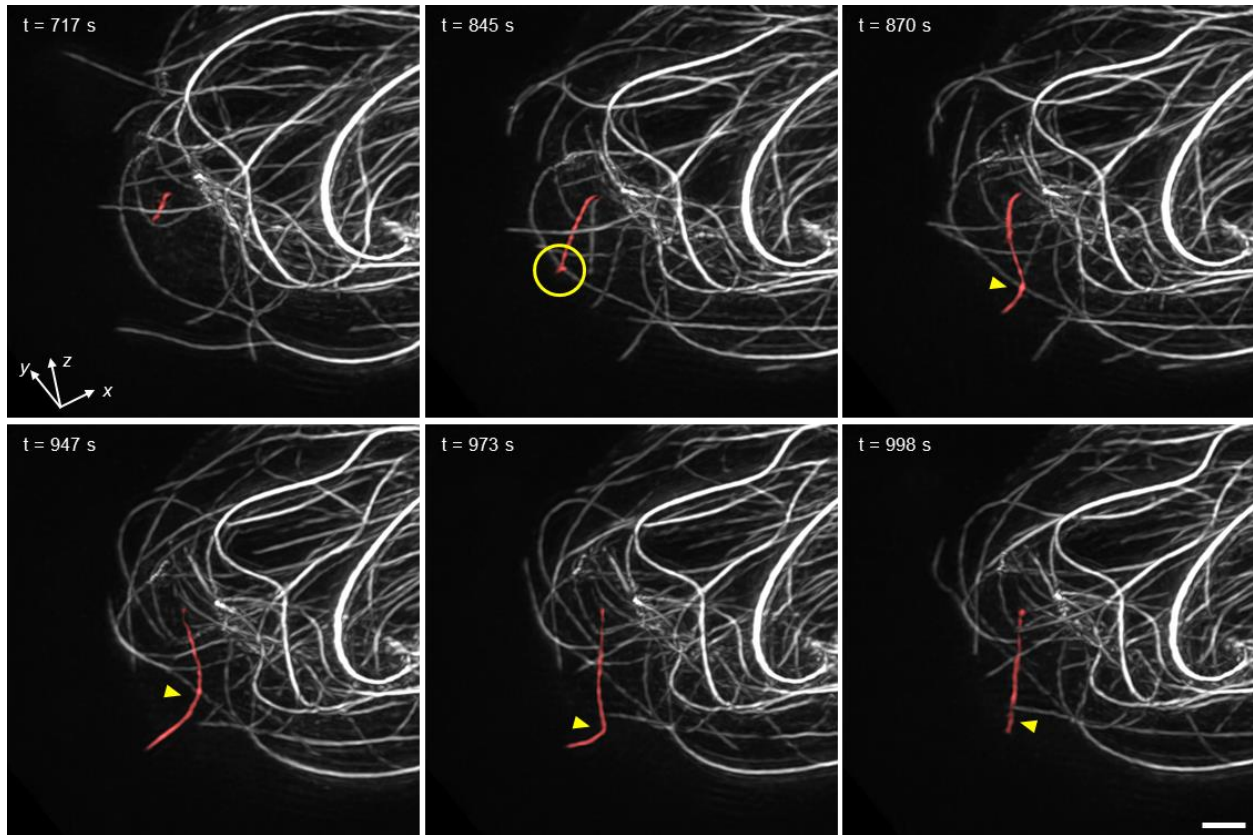

**Supplementary Fig. 20, Local sliding and buckling of microtubules within a living immune cell.** Selected volumetric reconstructions of Jurkat T cell expressing EMTB 3x GFP are shown from a 50-timepoint series (volumes recorded every 25.6 s), in perspective views. Target microtubule (red,  $t = 717$  s) grows and subsequently contacts another microtubule ( $t = 845$  s, position marked with yellow circle). The target microtubule then appears to slide and buckle at the attachment point ( $t = 870$  s, 947 s, yellow arrowhead). A second buckling event occurs ( $t = 973$  s) before the microtubule appears to depolymerize ( $t = 998$  s). See also **Supplementary Video 16**. Scale bars:  $2\ \mu\text{m}$ .

**Supplementary Table 1, FWHMs of 100-nm beads acquired with 1.35 NA silicone oil immersion and 1.27 NA water immersion objectives. N: number of beads used for each statistic, std: standard deviation.**

| Figure #              | NA   | FWHM (nm) | Wide-field |      |     | 3D SIM |      |     | Four-beam SIM |      |    |
|-----------------------|------|-----------|------------|------|-----|--------|------|-----|---------------|------|----|
|                       |      |           | Mean       | std  | N   | Mean   | std  | N   | Mean          | std  | N  |
| Fig. 1g               | 1.35 |           | Mean       | std  | N   | Mean   | std  | N   | Mean          | std  | N  |
|                       |      | Lateral   | 267.5      | 15.7 | 102 | 118.6  | 10.9 | 100 | 123.5         | 12.1 | 99 |
|                       |      | Axial     | 581.4      | 22.5 |     | 300.6  | 12.9 |     | 163.0         | 12.9 |    |
| Extended Data Fig. 3d | 1.27 |           | Mean       | std  | N   | Mean   | std  | N   | Mean          | std  | N  |
|                       |      | Lateral   | 260.4      | 16.4 | 85  | 120.4  | 11.5 | 81  | 127.6         | 9.8  | 78 |
|                       |      | Axial     | 595.1      | 22.2 |     | 350.3  | 15.1 |     | 164.4         | 25.0 |    |

**Supplementary Table 2, Spatial resolution comparisons using modified decorrelation analysis.** N: number of lateral and axial images used for these measurements, std: standard deviation. All values in nm. Compare to the line profiles/visual callouts shown in the figures listed on the left column.

| Figure #<br>(sample / structure)                                            | Spatial resolution<br>(nm) | 3D SIM |      |     | Four-beam SIM |      |     | Deep learning isotropization |     |     |
|-----------------------------------------------------------------------------|----------------------------|--------|------|-----|---------------|------|-----|------------------------------|-----|-----|
|                                                                             |                            | Mean   | std  | N   | Mean          | std  | N   | Mean                         | std | N   |
| Fig. 2a-c<br>(Live vegetative <i>B. subtilis</i> , membranes)               |                            |        |      |     |               |      |     |                              |     |     |
|                                                                             | Lateral                    | 107.9  | 3.7  | 56  | 105.9         | 3.2  | 62  |                              |     |     |
|                                                                             | Axial                      | 348.3  | 20.9 | 100 | 152.2         | 33.1 | 59  |                              |     |     |
| Fig. 2e-g<br>(Fixed U2OS cell, outer mitochondrial membranes)               |                            | Mean   | std  | N   | Mean          | std  | N   | Mean                         | std | N   |
|                                                                             | Lateral                    | 111.8  | 4.4  | 65  | 107.8         | 2.8  | 65  |                              |     |     |
|                                                                             | Axial                      | 351.3  | 19.3 | 100 | 139.6         | 12.7 | 100 |                              |     |     |
| Fig. 4b, c<br>(Fixed U2OS cell, microtubules)                               |                            | Mean   | std  | N   | Mean          | std  | N   | Mean                         | std | N   |
|                                                                             | Lateral                    | 119.2  | 4.4  | 100 | 139.9         | 4.2  | 100 | 102.9                        | 3.5 | 100 |
|                                                                             | Axial                      | 377.1  | 1.3  | 100 | 160.4         | 9.4  | 87  | 113.7                        | 9.7 | 100 |
| Extended Data Fig. 4d-f<br>(Fixed U2OS cell, outer mitochondrial membranes) |                            | Mean   | std  | N   | Mean          | std  | N   | Mean                         | std | N   |
|                                                                             | Lateral                    | 116.2  | 4.7  | 60  | 128.9         | 6.0  | 58  | 116.6                        | 5.2 | 60  |
|                                                                             | Axial                      | 323.4  | 18.7 | 100 | 158.0         | 19.2 | 84  | 114.8                        | 8.0 | 100 |

**Supplementary Table 3, Quantitative comparisons amongst denoising methods, as assayed on images of immunolabeled Tomm20 in fixed U2OS cells.** 3D SIM reconstructions derived from high SNR input were taken as the ground truth. std: standard deviation. PSNR values are reported in dB. N: number of 2D slices used for each statistic, std: standard deviation. See also **Supplementary Fig. 18**. Entries with highest (best) values are bolded.

| Figure #                  | Methods                                                | SSIM        |      |    | PSNR         |      |    |
|---------------------------|--------------------------------------------------------|-------------|------|----|--------------|------|----|
|                           |                                                        | Mean        | std  | N  | Mean         | std  | N  |
| Supplementary<br>Fig. 18c | <b>Low SNR 3D SIM</b>                                  | 0.71        | 0.11 | 11 | 30.51        | 2.97 | 11 |
|                           | <b>One-step RCAN<br/>(1st step DL + Wiener filter)</b> | 0.83        | 0.06 | 11 | 32.78        | 3.29 | 11 |
|                           | <b>Two-step RCAN<br/>(2nd step DL)</b>                 | <b>0.86</b> | 0.03 | 11 | <b>34.14</b> | 3.18 | 11 |
|                           | <b>One-step RCAN<br/>(15 low SNR inputs)</b>           | 0.81        | 0.04 | 11 | 32.75        | 3.24 | 11 |
|                           | <b>One-step DenseDeconNet<br/>(15 low SNR inputs)</b>  | 0.85        | 0.04 | 11 | 33.14        | 3.26 | 11 |

**Supplementary Table 4, Quantitative comparisons of two-step RCAN with and without intermediate Wiener filter, as assayed on images of immunolabeled microtubules in fixed U2OS cells. 3D SIM reconstructions derived from high SNR input were taken as the ground truth. std: standard deviation. PSNR values are reported in dB. See also **Supplementary Fig. 19**. N: number of 2D slices used for each statistic, std: standard deviation. Entries with highest values are bolded.**

| Figure #                  | Methods                                          | SSIM        |      |    | PSNR         |      |    |
|---------------------------|--------------------------------------------------|-------------|------|----|--------------|------|----|
|                           |                                                  | Mean        | std  | N  | Mean         | std  | N  |
| Supplementary<br>Fig. 19c | <b>Two-step RCAN<br/>(with Wiener filter)</b>    | <b>0.84</b> | 0.03 | 14 | <b>33.09</b> | 1.63 | 14 |
|                           | <b>Two-step RCAN<br/>(without Wiener filter)</b> | 0.78        | 0.04 | 14 | 31.45        | 1.41 | 14 |



**Supplementary Table 5, Data acquisition and processing parameters for data acquired with the SIM platform.** All raw images have lateral dimensions of 1280 x 1080 pixels and are cropped into square regions for further processing. The volume size W x H x D represent voxel size in x, y, and z dimensions, C is the number of colors. The volume acquisition time includes all colors and 15 phases. In the “Deep learning?” column, A means axial resolution improvement and DN means denoising.

| Figure #                        | Sample/structure (excitation wavelength)                | Objective NA | Imaging mode  | Laser Intensity (W/cm <sup>2</sup> ) | volume size W x H x D x C (z step size) | Volume acquisition time | Volume or subvolume # (time interval) | Volume size after reconstruction (sample size, μm <sup>3</sup> ) | Deep learning ? |
|---------------------------------|---------------------------------------------------------|--------------|---------------|--------------------------------------|-----------------------------------------|-------------------------|---------------------------------------|------------------------------------------------------------------|-----------------|
| Fig. 1d, e                      | 100-nm yellow-green beads (488 nm)                      | 1.35         | four-beam SIM | 15                                   | 512 x 512 x 67 x 1 (60 nm)              | 26.5 s                  | 1                                     | 1024 x 1024 x 67 (~36 x 36 x 4)                                  | No              |
|                                 |                                                         |              | 3D SIM        | 15                                   | 512 x 512 x 32 x 1 (125 nm)             | 12.7 s                  | 1                                     | 1024 x 1024 x 32 (~36 x 36 x 4)                                  |                 |
| Supplementary Fig. 7            | 100-nm yellow-green beads (488 nm)                      | 1.27         | 3D SIM        | 5                                    | 256 x 256 x 32 x 1 (125 nm)             | 12.7 s                  | 1                                     | 512 x 512 x 32 (~21 x 21 x 4)                                    | No              |
| Extended Data Fig. 3            | 100-nm yellow-green beads (488 nm)                      | 1.27         | four-beam SIM | 15                                   | 512 x 512 x 67 x 1 (60 nm)              | 26.5 s                  | 1                                     | 1024 x 1024 x 67 (~42 x 42 x 4)                                  | No              |
|                                 |                                                         |              | 3D SIM        | 15                                   | 512 x 512 x 32 x 1 (125 nm)             | 12.7 s                  | 1                                     | 1024 x 1024 x 32 (~42 x 42 x 4)                                  |                 |
| Fig. 2a-c Supplementary Video 2 | Live vegetative <i>B. subtilis</i> , membranes (488 nm) | 1.35         | four-beam SIM | 4                                    | 256 x 256 x 67 x 1 (60 nm)              | 26.5 s                  | 1                                     | 512 x 512 x 67 (~18 x 18 x 4)                                    | No              |
|                                 |                                                         |              | 3D SIM        | 15                                   | 256 x 256 x 32 x 1 (125 nm)             | 12.7 s                  | 1                                     | 512 x 512 x 32 (~18 x 18 x 4)                                    |                 |
| Fig. 2e-g Supplementary Video 3 | Fixed U2OS cell, outer mitochondrial membranes (488 nm) | 1.35         | four-beam SIM | 4                                    | 512 x 512 x 67 x 1 (60 nm)              | 26.5 s                  | 1                                     | 1024 x 1024 x 67 (~36 x 36 x 4)                                  | No              |
|                                 |                                                         |              | 3D SIM        | 15                                   | 512 x 512 x 32 x 1 (125 nm)             | 12.7 s                  | 1                                     | 1024 x 1024 x 32 (~36 x 36 x 4)                                  |                 |

|                                                          |                                                                                                |      |                  |                             |                                 |        |              |                                        |    |
|----------------------------------------------------------|------------------------------------------------------------------------------------------------|------|------------------|-----------------------------|---------------------------------|--------|--------------|----------------------------------------|----|
| Fig. 2h, i<br>Supplementary<br>Video 4                   | Live U2OS cell, inner<br>mitochondrial membranes<br>(488 nm)                                   | 1.35 | four-beam<br>SIM | 5                           | 512 x 512 x 67 x 1<br>(60 nm)   | 26.5 s | 1            | 1024 x 1024 x 32<br>(~36 x 36 x 4)     | No |
| Supplementary<br>Fig. 10b                                | Fixed U2Os cell, F-actins<br>(488 nm)                                                          | 1.35 | 3D SIM           | 4                           | 512 x 512 x 64 x 1<br>(125 nm)  | 25.3 s | 1            | 1024 x 1024 x 64<br>(~36 x 36 x 8)     | No |
| Fig. 3a, b                                               | Live, sporulating <i>B.</i><br><i>subtilis</i> , spores (488 nm)<br>and membranes (561 nm)     | 1.27 | four-beam<br>SIM | 25 (488 nm)<br>13 (561 nm)  | 256 x 256 x 67 x 2<br>(60 nm)   | 53 s   | 1            | 512 x 512 x 67<br>(~21 x 21 x 4)       | No |
| Fig. 3c-g                                                | Fixed U2OS cell,<br>microtubules (488 nm)<br>and vimentin (561 nm)                             | 1.27 | four-beam<br>SIM | 20 (488 nm)<br>15 (561 nm)  | 960 x 960 x 100 x 2<br>(60 nm)  | 79 s   | 1            | 1920 x 1920 x<br>100<br>(~78 x 78 x 6) | No |
| Fig. 3h-n<br>Supplementary<br>Video 6                    | Fixed mouse liver<br>sinusoidal endothelial cell,<br>membranes (488 nm) and<br>actins (561 nm) | 1.27 | four-beam<br>SIM | 4.5 (488 nm)<br>25 (561 nm) | 1024 x 1024 x 67 x 2<br>(60 nm) | 53 s   | 1            | 2048 x 2048 x 67<br>(~84 x 84 x 4)     | No |
| Supplementary<br>Fig. 11a, b<br>Supplementary<br>Video 5 | Live, vegetative <i>B. subtilis</i> ,<br>DivIVA-GFP (488 nm)                                   | 1.27 | four-beam<br>SIM | 25                          | 352 x 352 x 67 x 1<br>(60 nm)   | 26.5 s | 1            | 704 x 704 x 67<br>(~29 x 291 x 4)      | No |
| Supplementary<br>Fig. 11c-d                              | Fixed U2OS cell,<br>microtubules (488 nm)                                                      | 1.27 | four-beam<br>SIM | 15                          | 768 x 768 x 100 x 1<br>(60 nm)  | 39.5   | 1            | 1536 x 1536 x<br>100<br>(~63 x 63 x 6) | No |
|                                                          |                                                                                                |      | 3D SIM           | 25                          | 768 x 768 x 48 x 1<br>(125 nm)  | 19 s   | 1            | 1536 x 1536 x 48<br>(~63 x 63 x 6)     |    |
| Supplementary<br>Fig. 11g, h<br>Supplementary<br>Video 7 | Live U2OS cell,<br>membranes (561 nm)                                                          | 1.27 | four-beam<br>SIM | 25                          | 512 x 512 x 67 x 1<br>(60 nm)   | 26.5 s | 10<br>(19 s) | 1024 x 1024 x 67<br>(~42 x 42 x 4)     | No |

|                                                     |                                                                            |      |               |                            |                             |        |   |                                  |         |
|-----------------------------------------------------|----------------------------------------------------------------------------|------|---------------|----------------------------|-----------------------------|--------|---|----------------------------------|---------|
| Supplementary Fig. 13c                              | Fixed U2OS cell, microtubules (488 nm)                                     | 1.27 | 3D SIM        | 4.5                        | 512 x 512 x 48 x 1 (125 nm) | 19 s   | 1 | 1024 x 1024 x 48 (~42 x 42 x 6)  | Yes (A) |
| Supplementary Fig. 13d                              | Fixed U2OS cell, outer mitochondrial membranes (488 nm)                    | 1.35 | 3D SIM        | 5                          | 512 x 512 x 64 x 1 (125 nm) | 25.3 s | 1 | 1024 x 1024 x 64 (~36 x 36 x 8)  | Yes (A) |
| Supplementary Fig. 13e-h                            | Live U2OS cell, inner mitochondrial membranes (488 nm)                     | 1.35 | 3D SIM        | 5                          | 512 x 512 x 64 x 1 (125 nm) | 25.3 s | 1 | 1024 x 1024 x 64 (~36 x 36 x 8)  | Yes (A) |
| Fig. 4b, c<br>Supplementary Fig. 16f                | Fixed U2OS cell, microtubules (488 nm)                                     | 1.27 | four-beam SIM | 15                         | 832 x 832 x 100 x 1 (60 nm) | 39.5 s | 1 | 1664 x 1664 x 100 (~68 x 68 x 6) | Yes (A) |
|                                                     |                                                                            |      | 3D SIM        | 25                         | 832 x 832 x 48 x 1 (125 nm) | 19 s   | 1 | 1664 x 1664 x 48 (~68 x 68 x 6)  |         |
| Fig. 4e-k                                           | Fixed mouse embryonic fibroblast, Caveolin-1 (488 nm) and Cavin-1 (561 nm) | 1.27 | 3D SIM        | 25 (488 nm)<br>21 (561 nm) | 512 x 512 x 32 (125 nm)     | 54.5 s | 1 | 1024 x 1024 x 32 (~42 x 42 x 4)  | Yes (A) |
| Extended Data Fig. 4a, b                            | Live vegetative <i>B. subtilis</i> , membranes (488 nm)                    | 1.35 | four-beam SIM | 4                          | 256 x 256 x 67 x 1 (60 nm)  | 26.5 s | 1 | 512 x 512 x 67 (~18 x 18 x 4)    | Yes (A) |
|                                                     |                                                                            |      | 3D SIM        | 15                         | 256 x 256 x 32 x 1 (125 nm) | 12.7 s | 1 | 512 x 512 x 32 (~18 x 18 x 4)    |         |
| Extended Data Fig. 4d-f<br>Supplementary Fig. 16a-e | Fixed U2OS cell, outer mitochondrial membranes (488 nm)                    | 1.35 | four-beam SIM | 4                          | 512 x 512 x 67 x 1 (60 nm)  | 26.5 s | 1 | 1024 x 1024 x 67 (~36 x 36 x 4)  | Yes (A) |
|                                                     |                                                                            |      | 3D SIM        | 15                         | 512 x 512 x 32 x 1 (125 nm) | 12.7 s | 1 | 1024 x 1024 x 32 (~36 x 36 x 4)  |         |
| Supplementary Fig. 15                               | Fixed mouse embryonic fibroblast, Caveolin-1 (488 nm)                      | 1.27 | 3D SIM        | 25                         | 512 x 512 x 32 (125 nm)     | 27.1 s | 1 | 1024 x 1024 x 32 (~42 x 42 x 4)  | Yes (A) |

|                                            |                                                                                          |      |        |                              |                                |        |               |                                    |                 |
|--------------------------------------------|------------------------------------------------------------------------------------------|------|--------|------------------------------|--------------------------------|--------|---------------|------------------------------------|-----------------|
| Fig. 5b-d<br>Supplementary<br>Video 8      | Live U2OS cell, outer<br>mitochondrial membranes<br>(488 nm)                             | 1.27 | 3D SIM | 0.5                          | 512 x 512 x 32 x 1<br>(125 nm) | 12.7 s | 50<br>(9.7 s) | 1024 x 1024 x 32<br>(~42 x 42 x 4) | Yes<br>(DN + A) |
| Fig. 5e-k<br>Supplementary<br>Video 10, 12 | Live U2OS cell, lysosomal<br>membranes (488 nm) and<br>interior of lysosomes (561<br>nm) | 1.27 | 3D SIM | 0.8 (488 nm)<br>0.3 (561 nm) | 512 x 512 x 32 x 2<br>(125 nm) | 25.8 s | 60            | 1024 x 1024 x 32<br>(~42 x 42 x 4) | Yes<br>(DN + A) |
| Supplementary<br>Video 9                   | Live U2OS cell, lysosomal<br>membranes (488 nm)                                          | 1.27 | 3D SIM | 2                            | 576 x 576 x 32 x 1<br>(125 nm) | 12.7 s | 50<br>(4.8 s) | 1152 x 1152 x 32<br>(~47 x 47 x 4) | Yes<br>(DN + A) |
| Supplementary<br>Video 11                  | Live U2OS cell, lysosomal<br>membranes (488 nm) and<br>interior of lysosomes (561<br>nm) | 1.27 | 3D SIM | 0.5 (488 nm)<br>0.3 (561 nm) | 448 x 448 x 24 x 2<br>(125 nm) | 19 s   | 60            | 896 x 896 x 24<br>(~37 x 37 x 3)   | Yes<br>(DN + A) |
| Supplementary<br>Fig. 17b, c               | Fixed U2OS cell, outer<br>mitochondrial membranes<br>(488 nm)                            | 1.35 | 3D SIM | 0.8                          | 512 x 512 x 32 x 1<br>(125 nm) | 12.7 s | 1             | 1024 x 1024 x 32<br>(~36 x 36 x 4) | Yes<br>(DN + A) |
| Supplementary<br>Fig. 18c                  | Fixed U2OS cell, outer<br>mitochondrial membranes<br>(488 nm)                            | 1.35 | 3D SIM | 0.8                          | 512 x 512 x 64 x 1<br>(125 nm) | 25.3 s | 1             | 1024 x 1024 x 64<br>(~36 x 36 x 8) | Yes<br>(DN)     |
| Supplementary<br>Fig. 19c                  | Fixed U2OS cell,<br>microtubules (488 nm)                                                | 1.35 | 3D SIM | 0.4                          | 512 x 512 x 48 x 1<br>(125 nm) | 19 s   | 1             | 1024 x 1024 x 48<br>(~36 x 36 x 6) | Yes<br>(DN)     |
| Fig. 6<br>Supplementary<br>Video 13-15     | Live Jurkat T cell,<br>microtubules (488 nm)                                             | 1.27 | 3D SIM | 0.8                          | 256 x 256 x 32 x 1<br>(125 nm) | 12.8 s | 100           | 512 x 512 x 32<br>(~21 x 21 x 4)   | Yes<br>(DN + A) |

|                                                       |                                              |      |        |     |                                |        |                |                                  |                 |
|-------------------------------------------------------|----------------------------------------------|------|--------|-----|--------------------------------|--------|----------------|----------------------------------|-----------------|
| Supplementary<br>Fig. 20<br>Supplementary<br>Video 16 | Live Jurkat T cell,<br>microtubules (488 nm) | 1.27 | 3D SIM | 0.5 | 256 x 256 x 32 x 1<br>(125 nm) | 12.8 s | 50<br>(12.8 s) | 512 x 512 x 32<br>(~21 x 21 x 4) | Yes<br>(DN + A) |
|-------------------------------------------------------|----------------------------------------------|------|--------|-----|--------------------------------|--------|----------------|----------------------------------|-----------------|

## Legends for Supplementary Videos

**Supplementary Video 1:** Images of autofluorescence from dirty coverslip during z stack with lateral illumination modulation (left, before mirror alignment) versus mostly axial modulation (right, after mirror alignment). See also **Extended Data Fig. 2c**.

**Supplementary Video 2:** 3D projections of live vegetative *B. subtilis* stained with CellBrite Fix 488, marking membranes. Wide-field (top), 3D SIM (middle), and four-beam SIM reconstructions (bottom) are compared. See also **Fig. 2b**.

**Supplementary Video 3:** 3D projections of fixed U2OS cell labeled with Tomm20 primary and rabbit Alexa Fluor 488 secondary antibodies, marking outer mitochondrial membranes. Wide-field (left), 3D SIM (middle), and four-beam SIM (right) reconstructions are compared. See also **Fig. 2f, g**.

**Supplementary Video 4:** Live U2OS cell stained with MitoTracker Green FM. First movie segment shows lateral views as a function of z (that is, 'z stack'). Second movie segment shows the axial view as a function of lateral coordinate. See also **Fig. 2h, i**.

**Supplementary Video 5:** Four-beam SIM imaging of live, vegetative *B. subtilis* with GFP-DivIVA marker, projection view. See also **Supplementary Fig. 11b**.

**Supplementary Video 6:** Four-beam SIM imaging of fixed mouse liver sinusoidal endothelial cells with CellBrite Fix 488 label, marking membrane (cyan) and Alexa Fluor 568 phalloidin, marking actin filaments (magenta). See also **Fig. 3h**.

**Supplementary Video 7:** Time-lapse imaging of live U2OS cells stained with 200 nM Potomac Gold in four-beam SIM. Yellow arrow and rectangle highlight phototoxicity in one region. Red arrows highlight morphological changes of mitochondria between the 1<sup>st</sup> timepoint and the 10<sup>th</sup> timepoint. See also **Supplementary Fig. 11g, h**.

**Supplementary Video 8:** Time-lapse imaging of live U2OS cell expressing Tomm20-GFP marker. First movie segment shows 3D projections of mitochondrial dynamics after two-step denoising and isotropic prediction. Second movie segment shows higher magnification views of yellow rectangular region in the first movie segment. Raw low SNR 3D SIM reconstructions (top left), 1<sup>st</sup> step denoising results (top right), 2<sup>nd</sup> step denoising results (bottom left) and 3<sup>rd</sup> step isotropization (bottom right) are compared. Third movie segment shows axial planes indicated by yellow lines in the second movie segment. See also **Fig. 5b-d**.

**Supplementary Video 9:** Time-lapse imaging of live U2OS cell expressing LAMP1-EGFP marker. First movie segment shows 3D projections of lysosomal dynamics after two-step denoising and isotropic prediction. Second movie segment shows higher magnification views of yellow rectangular region in the first movie segment. Raw low SNR 3D SIM reconstructions (top left), 1<sup>st</sup> step denoising results (top right), 2<sup>nd</sup> step denoising results (bottom left) and 3<sup>rd</sup> step isotropization (bottom right) are compared. Third movie segment shows axial planes indicated by yellow lines in the second movie segment.

**Supplementary Video 10:** Time-lapse imaging of live U2OS cell expressing lysosomal marker LAMP1-GFP (cyan) and additionally labeled with LysoTracker Red to mark the lysosome interior (magenta). 3D projections of raw low SNR 3D SIM reconstructions (left) and two-step denoising and isotropization predictions (right) are compared. See also **Fig. 5e**.

**Supplementary Video 11:** Time-lapse imaging of additional live U2OS cell #2 expressing lysosomal marker LAMP1-GFP (cyan) and additionally labeled with LysoTracker Red to mark the lysosome interior (magenta). 3D projections of raw low SNR 3D SIM reconstructions (left) and two-step denoising and isotropization predictions (right) are compared.

**Supplementary Video 12:** Higher magnification view of maximum intensity projections of live U2OS cells in **Supplementary Video 10**. See also **Fig. 5k**.

**Supplementary Video 13:** Time-lapse imaging of live Jurkat T cells expressing EMTB 3x GFP after two-step denoising and isotropization prediction, perspective view. Two microtubule filaments are segmented (red and green), emphasizing that they are initially separated (yellow circles), merge together over the nucleus (yellow arrow), and separate again (yellow circles). See also **Fig. 6e**.

**Supplementary Video 14:** Time-lapse imaging of live Jurkat T cells expressing EMTB 3x GFP after two-step denoising and isotropization prediction. Microtubule organizing center is identified (cyan sphere, trajectory temporally coded as shown in color bar), and one microtubule filament is segmented (red), emphasizing their correlated, inward movement. Top: lateral perspective view. Bottom: Axial y-z view. See also **Fig. 6f**.

**Supplementary Video 15:** Time-lapse imaging of live Jurkat T cells expressing EMTB 3x GFP after two-step denoising and isotropization prediction, emphasizing buckling of two microtubule filaments (red and yellow spheres). Top: lateral perspective view. Bottom: Axial y-z view. See also **Fig. 6g**.

**Supplementary Video 16:** Time-lapse imaging of another live Jurkat T cell expressing EMTB 3x GFP after two-step denoising and isotropization prediction. One microtubule filament is segmented (red), and yellow arrows indicate buckling sites after sliding and contacting another filament. Left: lateral view. Right: zoomed-in perspective view. See also **Supplementary Fig. 20**.
